# Supplementary material
Source: publisher figshare collection journal article supplement (https://tandf.figshare.com/ndownloader/files/21952290)
Supplement: Supplementary file 1 [file 21952290]

## Sheet: grid
Name of the tool	Resource type (online training, card games, role-play scenarios, video, movie, case studies, infographics and flowcharts, podcasts, textbook, guidances, reports, visual arts, flash cards collections, checklist, PPT presentation, glossary, codes collection, instructor material)	Country	Author/ Institution	Date	URL	DOI	Topics/contents (research misconduct, questionable research practices, falsification, fabrication, plagiarism, authorship, peer review, publication ethics, mentor/trainee relationship, collaborative research, research with humans, research with animals, data management, conflict of interest, patenting, reproducibility, financial responsibilities, social responsibilities, safety, work environment,…	Background customization/ target audience (biomedical science, humanities, social sciences, engineering, natural sciences and physics, administrative sector)	Level of customization/target audience (bachelor students, master students, doctoral students, junior researchers, senior researchers, professors, principal investigators, trainers, administative staff)	Learning goals( knowledge,skills, awareness,attitute/behaviour)	Group or Standalone	Active/Passive learning approach	Virtues/Vices mentioned	Norms, codes or guidelines mentioned (RE, RI/ National, International)	Instruction for trainers available	Language	Duration	Final evaluation/assignement	Evaluation form available	Number of users
Dilemma game	card game	The Netherlands	Erasmus University Rotterdam	2013	https://www.eur.nl/en/about-eur/strategy-and-policy/scientific-integrity/dilemma-game	N/A	publication ethics, data management, plagiarism, authorship	no customization	doctoral students, junior researchers, senior researchers, principal investigators	attitude/behaviour, awareness	standalone/group	active	credibility	N/A	N/A	English	N/A	N/A	N/A	N/A
IMAGINE RRI	card game	Austria	University of Vienna (Ulrike Felt, Maximilian Fochler, and Lisa Sigl)	2017	https://www.rri-tools.eu/-/imagine-rri-a-card-based-method-for-reflecting-on-responsibility-in-life-science-research	https://doi.org/10.1080/23299460.2018.1457402	N/A	biomedical science and life sciences	bachelor students, master students, doctoral students, junior researchers, senior researchers, professors, principal investigators, trainers, administative staff	attitude/behaviour, awareness	standalone/group	active	responsibility	N/A	N/A	English	45 min. for each round	N/A	N/A	N/A
Peer review card exchang game	card game	Croatia	University of Split school of Medicine (Ružica Tokalić and Ana Marušić)	2018	http://europeanscienceediting.eu/articles/a-peer-review-card-exchange-game/	DOI:10.20316/ESE.2018.44.18007	peer review, publication ethics	no customization	bachelor students, master students, doctoral students, junior researchers, senior researchers, professors, principal investigators, trainers, administative staff	attitude/behaviour, awareness	standalone/group	active	responsiveness, competence, impartiality, confidentiality, constructive criticism, responsibility to science	N/A	http://europeanscienceediting.eu/wp-content/uploads/2018/08/ESE-Peer-Review-Card-Exchange-Game_Supplement-2-Instructions.pdf	English	30 min for each round	N/A	N/A	N/A
Annual review of ethics (case studies)	case studies	US	NIH	2001-2018	https://oir.nih.gov/sourcebook/ethical-conduct/responsible-conduct-research-training/annual-review-ethics-case-studies	N/A	research misconduct, authorship, mentor/trainee relationship, collaborative research, data management, social responsibilities, reproducibility,	biomedical science	doctoral students, junior researchers, , professors, trainers	attitude/behaviour, awareness	standalone/group	active	N/A	international and national guidelines	N/A	English	N/A	N/A	N/A	N/A
Biomedical research integrity cases	case studies	US	University of Washington	N/A	https://ori.hhs.gov/education/products/burke_washington/burke.pdf	N/A	collaborative science, conflict of interest, mentor/trainee relationship, research with animals, data management, research with humans, peer review, publication ethics, research misconduct	biomedical science	bachelor students, master students, trainers	attitude/behaviour, awareness	standalone/group	active	N/A	N/A	notes for instructors	English	N/A	N/A	N/A	N/A
Case studies for small group discussion	case studies	US	Memorial sloan Kettering, the Rockfeller University, Cornell University	2018-12-01	https://www.mskcc.org/sites/default/files/node/26556/documents/dec-cases-2018-sih-final.pdf	N/A	conflict of interest, research with humans, research misconduct, collaborative research, publication ethics, technology transfer	biomedical science	bachelor students, master students, doctoral students, junior researchers	attitude/behaviour, awareness	standalone/group	active	N/A	N/A	N/A	English	N/A	N/A	N/A	N/A
Case studies for small group discussion	case studies	US	Memorial sloan Kettering, the Rockfeller University, Cornell University	oct. 2018	https://www.mskcc.org/sites/default/files/node/26556/documents/oct-cases-2018-final-7-9-18.pdf	N/A	safety, whistleblowing, fabrication, falsification, data management, research with animals, research with humans, publication ethics, conflict of interest, mentor/trainee relationaship,	biomedical science	bachelor students, master students, doctoral students, junior researchers	attitude/behaviour, awareness	standalone/group	active	N/A	N/A	N/A	English	N/A	N/A	N/A	N/A
Case study collection	case studies	US	Ethics education library	N/A	http://ethics.iit.edu/eelibrary/case-study-collection	N/A	research with animals, authorship,research misconduct, conflict of interest, date managemet, research with humans, mentor/trainee relationship,publication ethics, intellectual property, safety, social and professional responsibilities,	biomedical science, engineering, social sciences	bachelor students, master students, doctoral students, junior researchers, trainers	attitude/behaviour, awareness	standalone/group	active	N/A	N/A	http://ethics.iit.edu/eelibrary/node/17816	English	N/A	N/A	N/A	N/A
Case study pack No. I	case studies	UK	UKRIO	N/A	https://ukrio.org/wp-content/uploads/UKRIO-Case-study-pack-No.-1.pdf	N/A	allegation of misconduct	no customization	bachelor students, master students, doctoral students, junior researchers, senior researchers	attitude/behaviour, awareness	standalone/group	active	N/A	N/A	N/A	English	N/A	N/A	N/A	N/A
Case summaries	case studies	US	ORI	N/A	https://ori.hhs.gov/case_summary	N/A	research misconduct	no customization	bachelor students, master students, doctoral students, junior researchers, senior researchers, professors, principal investigators, trainers	attitude/behaviour, awareness	standalone/group	active	N/A	N/A	N/A	English	N/A	N/A	N/A	N/A
cases for teaching engineering ethics	case studies	US	the ethics center for engineering and science	N/A	https://www.onlineethics.org/Resources/csaindex.aspx	N/A	N/A	engineering	trainers, professors, principal investigators	attitude/behaviour, knowledge, skills	standalone/group	active/passive	N/A	N/A	N/A	English	N/A	N/A	N/A	N/A
Cases: professional practices	case studies	US	The online ethics center (OEC)	N/A	https://www.onlineethics.org/CMS/profpractice/ppcases.aspx	N/A	N/A	engineering	senior researchers, professors, principal investigators, trainers, administative staff	attitude/behaviour, awareness	standalone/group	active	N/A	N/A	notes for instructors	English	N/A	N/A	N/A	N/A
COPE cases	case studies	UK	COPE	N/A	https://publicationethics.org/cases	N/A	research misconduct, questionable research practices, plagiarism, authorship, conflict of interest, publication ethics, financial responsibilities, whistleblowing, peer review, copyright, collaborative research	no customization	bachelor students, master students, doctoral students, junior researchers, senior researchers, professors, principal investigators, trainers	attitude/behaviour, awareness	standalone/group	active	N/A	N/A	N/A	English	N/A	N/A	N/A	N/A
Educating yourself about plagiarism – Case studies on Grey areas	case studies	Europe	Nottingham Trent University, United Kingdom, University of Derby, United Kingdom/ ENAI	2019	http://www.academicintegrity.eu/wp/wp-content/uploads/2019/01/ENAI_Case_studies_on_Grey_areas.pdf	N/A	plagiarism	no customization	bachelor students, master students, doctoral students, junior researchers, trainers	attitude/behaviour, awareness	group	active	N/A	N/A	notes for instructors	English	N/A	N/A	N/A	N/A
ENRIO collection	case studies	Europe	ENRIO	N/A	http://www.enrio.eu/resources/?cat=4 , http://www.enrio.eu/resources/?cat=5	N/A	authorship, mentor/trainee relationship, peer review, data managemet, conflict of interest, research misconduct, fabrication, falsification, QRPs	no customization	bachelor students, master students, doctoral students, junior researchers, senior researchers, professors, principal investigators, trainers	attitude/behaviour, awareness	standalone/group	active	N/A	national and international guidelines	N/A	English	N/A	N/A	N/A	N/A
Ethics case studies	case studies	US	Webguru - guide for undergraduate research (Northeastern University)	N/A	http://www.webguru.neu.edu/professionalism/research-integrity/ethics-case-studies	N/A	safety, research misconduct,	no customization	bachelor students	attitude/behaviour, awareness	standalone/group	active	N/A	N/A	N/A	English	N/A	N/A	N/A	N/A
Ethics Unwrapped cases	case studies	US	Mc Combs school of Business, Texas	N/A	https://ethicsunwrapped.utexas.edu/case-studies	N/A	N/A	no customization	bachelor students, master students, doctoral students, junior researchers	attitude/behaviour, awareness	standalone/group	active	N/A	N/A	N/A	English, Spanish	N/A	N/A	N/A	N/A
On being a scientist (third edition)	case studies	US	National academy of sciences, national academy of engineering and institute of medicine	third edition 2009	https://www.nap.edu/read/12192/chapter/1	N/A	mentor/trainee relationship, data management, research misconduct, research with humans, research with animals, safety, authorship, publication ethics, intellectual property, conflict of interest, social responsibilities	biomedical science	bachelor students, master students, doctoral students, junior researchers, senior researchers	attitude/behaviour, awareness	standalone/group	active	honesty, fairness, objectivity, openess, trustworthyness, respect for others	N/A	N/A	English	N/A	N/A	N/A	N/A
Plagiarism cheating, and research integrity: case studies from a master studies in Peru	case studies	Peru	Carnero et all.	2016	https://www.nrin.nl/ri-collection/library/publications/research-articles/plagiarism/case-studies-from-a-masters-program-in-peru/	doi: 10.1007/s11948-016-9820-z	plagiarism	biomedical science	master students	attitude/behaviour, awareness	standalone/group	passive	N/A	guidelines	N/A	English	N/A	N/A	N/A	N/A
RCR	case studies	US	Cornell University	N/A	https://www.oria.cornell.edu/rcr/cases.htm	N/A	authorship, collaborative research, conflict of interest, data management, mentor/trainee relationship, peer review, research with animals, research with animals, research misconduct	biomedical science	bachelor students, master students, doctoral students, junior researchers	attitude/behaviour, awareness	standalone/group	active	N/A	N/A	N/A	English	N/A	N/A	N/A	N/A
RCR case studies	case studies	N/A	CTSpedia	N/A	https://www.ctspedia.org/do/view/CTSpedia	N/A	RE/RI topics	biomedical science	bachelor students, master students, doctoral students, junior researchers	attitude/behaviour, awareness	standalone/group	active	N/A	N/A	N/A	English	N/A	N/A	N/A	N/A
RCR Casebook	case studies	US	St. Luis University (James M. Dubois)/ funded by ORI	N/A	https://ori.hhs.gov/rcr-casebook-stories-about-researchers-worth-discussing	N/A	authorship, publication ethics, research misconduct, collaborative research, data management, conflict of interest, peer review, social responsibilities, mentor/trainee relationship	no customization	bachelor students, master students, doctoral students, junior researchers, senior researchers, professors, principal investigators, trainers	attitude/behaviour, awareness	standalone/group	active	N/A	N/A	https://ori.hhs.gov/sites/default/files/Instructor's%20Manual_Final_edited.pdf	English	N/A	N/A	N/A	N/A
Responsible conduct of research:case studies	case studies	US	USC: University of suthern california	N/A	https://oprs.usc.edu/files/2017/04/RCR-Case-Studies.pdf	N/A	research with animal, conflict of interest, data management, mentor/trainee relationship, collaborative research, publication ethics, authorship, peer review, research misconduct, research with humans	biomedical science	master students, doctoral students, junior researchers	attitude/behaviour, awareness, skills	standalone/group	active	N/A	N/A	N/A	English	N/A	N/A	N/A	N/A
Retraction Watch	case studies	US	Retraction Watch	N/A	https://retractionwatch.com/	N/A	N/A	no customization	bachelor students, master students, doctoral students, junior researchers, senior researchers, professors, principal investigators, trainers, administative staff	awareness	standalone/group	passive	N/A	N/A	N/A	English	N/A	N/A	N/A	N/A
Scenarios in business and engineering setting	case studies	US	the ethics center for engineering and science	2016	https://www.onlineethics.org/Resources/instructguides/speakersguide/speakersguide_scenarios.aspx	N/A	social responsibilities, data management, copyright, conflict of interest	engineering	trainers, professors, principal investigators	attitude/behaviour, knowledge, skills	standalone/group	active/passive	N/A	N/A	N/A	English	N/A	N/A	N/A	N/A
Selected resources and case studies for academics	case studies	Hong Kong	Faculty of Law, University of Hong Kong	N/A	http://www.law.hku.hk/researchintegrity/	N/A	data management, plagiarism, authorship	Law	bachelor students, master students, doctoral students, junior researchers	attitude/behaviour, awareness	standalone/group	active	responsibility, accountability, openess, objectivity, fairness, responsibility for nurturing students and early career research	RI international guidelines	N/A	English	N/A	N/A	N/A	N/A
Research Integrity - case studies	case studies, videos, role-play scenarios	US	Michigan State University	N/A	https://grad.msu.edu/researchintegrity/casestudies	N/A	authorship, peer review, conflict of interest, research with humans, research with animals, mentor/trainee relationship, collaborative research, data management, intellectual property, research miscunduct	no customization	bachelor students, master students	attitude/behaviour, awareness, knowledge	standalone/group	active/passive	honesty	N/A	N/A	English	N/A	N/A	N/A	N/A
Research Integrity and the Responsible Conduct of Research - Checklist for Research Students and their Supervisors at the University of Oxford	checklist	UK	University of Oxford	2014	https://www.learning.ox.ac.uk/media/global/wwwadminoxacuk/localsites/oxfordlearninginstitute/documents/overview/rsv/Integrity_checklist_August_2014.pdf	N/A	research with humans, authorship, publication ethics, research with animals, research misconduct, mentor/trainee relationship, data management, collaborative research, conflict of interest, peer review, moral reasoning, social responsibilities	no customization	bachelor students, master students, doctoral students, junior researchers, senior researchers, professors, principal investigators, trainers, administative staff	knowledge	standalone	passive	N/A	Codes and guidelines	N/A	English	N/A	N/A	N/A	N/A
Research interity list at KU Leuven	checklist	Belgium	KU Leuven	N/A	https://www.kuleuven.be/english/research/integrity/Checklist	N/A	authorship, conflict of interest, plagiarism, data managemet, allegation of misconduct	no customization	bachelor students, master student, doctoral school	awareness, knowledge	standalone	passive	Rigour, reliability, verifiability, independence, impartiality, honesty, fairness	intenational and national guidelines and norms	N/A	English	N/A	N/A	N/A	N/A
Academic integrity checklist	checklist	The Netherlands	Utrecht University	N/A	https://students.uu.nl/sites/default/files/uu-academicintegrity.pdf	N/A	data management, plagiarism, authorship,	no customization	baschelor students, master students	knowledge	standalone	passive	reliability, responsibilities, impartiality, scrupolousness, collaboration, ambition	N/A	N/A	English	N/A	N/A	N/A	N/A
Data management checklist	checklist	UK	UK data service	N/A	https://www.ukdataservice.ac.uk/manage-data/plan/checklist	N/A	N/A	no customization	bachelor students, master students, doctoral students, junior researchers, senior researchers, professors, principal investigators	attitude/behaviour, knowledge	standalone	passive	N/A	N/A	N/A	English	N/A	N/A	N/A	N/A
Digital Health Decision-Making Checklist: Designed for Researchers	checklist	US	University of California (San Diego)	2018	http://thecore.ucsd.edu/wp-content/uploads/2018/11/DM_Checklist_Final.pdf	N/A	N/A	biomedical science	bachelor students, master students, doctoral students, junior researchers, senior researchers, professors, principal investigators	attitude/behaviour, skills	standalone	passive	N/A	N/A	N/A	English	N/A	N/A	N/A	N/A
recommended checklist for researchers	checklist	UK	UKRIO	N/A	https://ukrio.org/wp-content/uploads/UKRIO-Recommended-Checklist-for-Researchers.pdf	N/A	N/A	no customization	bachelor students, master students, doctoral students, junior researchers, senior researchers, professors, principal investigators	attitude/behaviour	standalone	passive	N/A	N/A	N/A	English	N/A	N/A	N/A	N/A
Sample partering agreement template	checklist	US	NIH	N/A	https://ombudsman.nih.gov/partnerAgree	N/A	collaborative research	no customization	doctoral students, junior researchers, senior researchers, professors, principal investigators	attitude/behaviour, skills	standalone/group	passive	collaboration	N/A	N/A	English	N/A	N/A	N/A	N/A
Check your personal referencing style: what type of citer are you	checklist/guidance	Germany	Unversity of Konstanz	2016	https://www.plagiatspraevention.uni-konstanz.de/typo3temp/secure_downloads/89774/0/869cb3b985b8c800442ca31ce26950cdee29c04b/Zitiertypencheck_English-Version_2016-10-26-1.pdf	N/A	plagiarism	no customization	bachelor students, master students, doctoral students	skills	standalone	active/passive	N/A	N/A	N/A	English	N/A	N/A	N/A	N/A
The Ethics Codes collection	codes collection	US	Illinois Institute of Technology Hermann Hall	N/A	http://ethicscodescollection.org/	N/A	N/A	no customization	bachelor students, master students, doctoral students, junior researchers, senior researchers, professors, principal investigators, trainers, administative staff	knowledge	standalone	passive	N/A	N/A	N/A	English	N/A	N/A	N/A	N/A
Codes/guidelines	codes collection	Europe	ENRIO	N/A	http://www.enrio.eu/resources/?cat=6	N/A	N/A	no customization	bachelor students, master students, doctoral students, junior researchers, senior researchers, professors, principal investigators, trainers, administative staff	knowledge	standalone	passive	N/A	RI and RE codes and guidelines	N/A	English	N/A	N/A	N/A	N/A
Research Integrity flashcards	Flashcards collection	N/A	N/A	N/A	https://quizlet.com/subject/research-integrity/	N/A	research with humans, authorship, publication ethics, research with animals, research misconduct, mentor/trainee relationship, data management, collaborative research, conflict of interest, peer review, moral reasoning, social responsibilities	no customization	bachelor students, master students	knowledge	standalone	active/passive	N/A	different guidelines	N/A	English	N/A	N/A	N/A	N/A
Responsible conduct of research flashcards	Flashcards collection	N/A	N/A	N/A	https://quizlet.com/subject/responsible-conduct-of-research/	N/A	research with humans, authorship, publication ethics, research with animals, research misconduct, mentor/trainee relationship, data management, collaborative research, conflict of interest, peer review, moral reasoning, social responsibilities	no customization	bachelor students, master students	knowledge	standalone	active/passive	N/A	different guidelines	N/A	English	N/A	N/A	N/A	N/A
ENAI glossary	glossary	Europe	ENAI	2018	http://www.academicintegrity.eu/wp/glossary/	N/A	N/A	no customization	bachelor students, master students, doctoral students, junior researchers,	knowledge	standalone	passive	N/A	N/A	N/A	English	N/A	N/A	N/A	N/A
Integrity factor glossary	glossary	The Netherlands	UMCG, MCL	N/A	http://integrityfactor.nl/glossary	N/A	N/A	no customization	bachelor students, master students, doctoral students, junior researchers,	knowledge	standalone	passive	N/A	N/A	N/A	English	N/A	N/A	N/A	N/A
Good research practices	guidance	UK	Medical research council	N/A	https://mrc.ukri.org/publications/browse/good-research-practice-principles-and-guidelines/	N/A	data management, collaborative research, safety, peer review,conflict of interst, allegation of misconduct	biomedical science	bachelor students, master students, doctoral students, junior researchers, senior researchers, professors, principal investigators	attitude/behaviour, knowledge, skills	standalone	passive	respect, integrity, honesty, transparency, openess, accountability	guidelines	N/A	English	N/A	N/A	N/A	N/A
Wiley's best practice guidelines on publishing ethics	guidance	US	Wiley	2014	https://authorservices.wiley.com/ethics-guidelines/research-integrity.html	N/A	research misconduct, whistleblowing, fabrication, falsification, image manipulation, allegation of misconduct, publication ethics	no customization	bachelor students, master students, doctoral students, junior researchers,	attitude/behaviour, knowledge, skills	standalone	passive	N/A	guidelines	N/A	English	N/A	N/A	N/A	N/A
How to handle authorship disputes: a guide for new researchres	guidance	UK	COPE	2003	https://publicationethics.org/files/2003pdf12.pdf	N/A	authorship	no customization	master students, doctoral students, junior researchers,	awareness, knowledge, skills	standalone	passive	N/A	ICMJE guideline	N/A	English	N/A	N/A	N/A	N/A
Avoiding plagiarism, self-plagiarism, and other questionable writing practices: A guide to ethical writing	guidance	US	Miguel Roig (ORI)	2015	https://ori.hhs.gov/sites/default/files/plagiarism.pdf	N/A	publication ethics, plagiarism, questionable research practices	no customization	bachelor students, master students, doctoral students, junior researchers,	attitude/behaviour, knowledge, skills	standalone	passive	N/A	N/A	N/A	English	N/A	N/A	N/A	N/A
Detecting and determining greyscales	guidance	Germany	Headtcentre	N/A	https://headt.eu/Research-Integrity	N/A	plagiarism, falsification, image manipulation	no customization	bachelor students, master students, doctoral students, junior researchers, senior researchers, professors, principal investigators, trainers	attitude/behaviour, knowledge, skills	standalone	passive	N/A	N/A	N/A	English	N/A	N/A	N/A	N/A
Ethics in research & publication	guidance	The Netherlands	Elsevier	2017	https://www.elsevier.com/__data/assets/pdf_file/0008/653885/Ethics-in-research-and-publication-brochure.pdf	N/A	publication ethics, authorship, plagiarism, questionable research practices	no customization	bachelor students, master students, doctoral students, junior researchers,	attitude/behaviour, knowledge, skills	standalone	passive	N/A	publication-related guidelines	N/A	English	N/A	final assignments	N/A	N/A
Five simple rules	guidance	US/UK	Ober H., Simon S.I., Elson D.	2012	https://link.springer.com/article/10.1007/s10439-012-0662-9	https://doi.org/10.1007/s10439-012-0662-9	plagiarism	no customization	bachelor students, master students, doctoral students, junior researchers,	attitude/behaviour, knowledge, skills	standalone	passive	N/A	N/A	N/A	English	N/A	N/A	N/A	N/A
How to detect image manipulations?	guidance	Germany	Headtcentre	N/A	https://headt.eu/page-18145	N/A	image manipulation	no customization	bachelor students, master students, doctoral students, junior researchers, senior researchers, professors, principal investigators, trainers	attitude/behaviour, knowledge, skills	standalone	passive	N/A	N/A	N/A	English	N/A	N/A	N/A	N/A
ICMJE conflict of interest	guidance	Worldwide	ICMJE	N/A	http://www.icmje.org/conflicts-of-interest/	N/A	conflict of interest	biomedical science	bachelor students, master students, doctoral students, junior researchers, senior researchers, professors, principal investigators	attitude/behaviour, knowledge, skills	standalone	passive	N/A	guideline	N/A	English	N/A	N/A	N/A	N/A
ICMJE recommendations	guidance	Worldwide	ICMJE	2018	http://www.icmje.org/recommendations/	N/A	publication ethics, peer review, authorship	biomedical science	bachelor students, master students, doctoral students, junior researchers, senior researchers, professors, principal investigators	attitude/behaviour, knowledge, skills	standalone	passive	N/A	guideline	N/A	English	N/A	N/A	N/A	N/A
Ten simple rules for developing a mentor-mentee expectations document	guidance	US	Masters S.K., Kreeger P.K.	2017	https://www.ncbi.nlm.nih.gov/pmc/articles/PMC5608163/	doi: 10.1371/journal.pcbi.1005709	mentor/trainee relationship	no customization	bachelor students, master students, doctoral students, junior researchers, senior researchers, professors, principal investigators	attitude/behaviour, skills	standalone	passive	N/A	N/A	N/A	English	N/A	N/A	N/A	N/A
Supervision of doctoral dissertations and their review process in Finland with a special emphasis on research integrity	guidance	Finland	Finnish advisory board on research integrity	2017	https://www.tenk.fi/sites/tenk.fi/files/TENK_UNIFI_recommendations_supervision_of_doctoral_dissertations.pdf	N/A	mentor/trainee relationship, copyright, authorship, data management, plagiarism,	no customization	senior researchers, professors, principal investigators, trainers	attitude/behaviour, knowledge, skills	standalone	passive	N/A	national guidelines	N/A	English	N/A	N/A	N/A	N/A
Research Integrity at Griffith University	infographics and flowcharts	Australia	Griffith Univestity	N/A	https://www.griffith.edu.au/research/research-services/research-ethics-integrity/research-integrity	N/A	research misconduct, authorship, mentor/trainee relationship, collaborative research, allegation to misconduct, open access, publication ethics, data management, conflict of interest	no customization	bachelor students, master student, doctoral school	attitude/behaviour, awareness, knowledge	standalone	passive	honesty, integrity, respect for the environment, good stewardship, responsibilities	intenational and national guidelines and norms	N/A	English	N/A	N/A	N/A	N/A
Authorship and publication	infographics and flowcharts	Australia	QUT (Queensland university of tecnhology and OREI)	2018	https://figshare.com/articles/Authorship_and_Publication/5801682	https://doi.org/10.1186/s41073-018-0046-2	authorship, conflict of interest, open access, peer review	no customization	bachelor students, master students, doctoral students, junior researchers, senior researchers, professors, principal investigators, trainers	attitude/behaviour, awareness, knowledge	standalone	passive	responsibilities	publication-related guidelines	N/A	English	N/A	N/A	N/A	N/A
COPE flowcharts	infographics and flowcharts	UK	COPE	N/A	https://publicationethics.org/resources/flowcharts	N/A	authorship, publication ethics, peer review, conflict of interest, intellectual property, data management, allegation of misconduct	no customization	bachelor students, master students, doctoral students, junior researchers, senior researchers, professors, principal investigators	attitude/behaviour, awareness, skills	standalone	passive	N/A	N/A	N/A	English, Arabic, Chinese, Croatian, French, Italian, Japanese, Persian, Polish, Portuguese, Spanish, Turkish	N/A	N/A	N/A	N/A
Journal peer review	infographics and flowcharts	Australia	QUT (Queensland university of tecnhology and OREI)	2018	https://figshare.com/articles/Journal_Peer_Review/5782815	https://doi.org/10.1186/s41073-018-0046-2	peer review	no customization	bachelor students, master students, doctoral students, junior researchers, senior researchers, professors, principal investigators, trainers	attitude/behaviour, awareness, knowledge	standalone	passive	fairness, transparency, competence, confidentiality	N/A	N/A	English	N/A	N/A	N/A	N/A
ORI Infographics	infographics and flowcharts	US	ORI	N/A	https://ori.hhs.gov/infographics	N/A	data management, research misconduct, whistleblowing, questionable research practices, allegation of misconduct, authorship, mentor/trainee relationship, social responsibilities, grant application	no customization	bachelor students, master students, doctoral students, junior researchers, senior researchers, professors, principal investigators, trainers	attitude/behaviour, awareness	standalone	passive	honesty, availability	N/A	N/A	English	N/A	N/A	N/A	N/A
Plagiarism factsheet	infographics and flowcharts	The Netherlands	Elsevier academy	N/A	https://www.elsevier.com/__data/assets/pdf_file/0009/653886/Plagiarism-factsheet.pdf	N/A	plagiarism	no customization	bachelor students, master students, doctoral students, junior researchers, senior researchers, professors, principal investigators	awareness	standalone	passive	N/A	N/A	N/A	English	N/A	N/A	N/A	N/A
Getting started in teaching about ethical issues in physics	instructor material	US	the ethics center for engineering and science	2018	https://www.onlineethics.org/Resources/40675.aspx	N/A	N/A	physics	trainers, professors, principal investigators	attitude/behaviour, knowledge, skills	standalone/group	passive	N/A	N/A	N/A	English	N/A	N/A	N/A	N/A
Instructor's guide to prepare research group leader as RCR Mentors	instructor material	US	the ethics center for engineering and science	2016	https://www.onlineethics.org/Resources/34199.aspx	N/A	N/A	no customization	trainers, professors, principal investigators	attitude/behaviour, knowledge, skills	standalone/group	active/passive	N/A	different guidelines	N/A	English	N/A	N/A	N/A	N/A
On being a scientist	movie	The Netherlands	Leiden University	2016	https://www.youtube.com/watch?v=tCgZSjoxF7c&feature=youtu.be	N/A	research misconduct, authorship, mentor/trainee relationship, data managemet, intellectual property, conflict of interest, social responsibilities	no customization	bachelor students, master students, doctoral students, junior researchers, senior researchers, professors, principal investigators, trainers, administative staff (RI officer)	attitude/behaviour, awareness	standalone/group	active/passive	reliability, honesty, respect, accountability	N/A	N/A	English	56 min in total (9 epidoses)	N/A	system of rating	available
Fiction movies for RCR education	movie	The Netherlands	NRNI collection	N/A	https://www.nrin.nl/fiction-movies-for-rcr-education/	N/A	depending on the movie: conflict of interest, intellectual property, mentor/trainee relationship, reproducibility, publication ethics, plagiarism	no customization	bachelor students, master students, doctoral students, junior researchers, senior researchers, professors, principal investigators, trainers, administative staff	awareness	standalone	active/passive	N/A	N/A	N/A	English	N/A	N/A	N/A	N/A
The Lab-avoiding research misconduct	movie	US	ORI	2017	https://ori.hhs.gov/content/thelab	N/A	research misconduct, collaborative research, whistleblowing, mentor/trainee relationaship, allegation of misconduct	biomedical science, natural science and physics	bachelor students, master students, doctoral students, junior researchers, senior researchers, professors, principal investigators, trainers, administative staff (RI officer)	attitude/behaviour, awareness, knowledge, skills	standalone/group	active	N/A	N/A	notes for instructors	English, Chinese, Japanese, Spanish	depending on the character but no less than 40 min.	N/A	N/A	N/A
The Research Clinic	movie	US	ORI	2017	https://ori.hhs.gov/research-clinic	N/A	data management, research misconduct, research with humans, financial responsibilities	biomedical science	bachelor students, master students, doctoral students, junior researchers, senior researchers, professors, principal investigators, trainers, administative staff (RI officer)	attitude/behaviour, awareness, knowledge, skills	standalone/group	active	N/A	N/A	N/A	English	depending on the character but no less than 40 min.	N/A	N/A	N/A
Integrity factor	movie	The Netherlands	UMCG, MCL	N/A	http://integrityfactor.nl/	N/A	authorship, research misconduct, mentor/trainee relationship, reproducibility, publication ethics	biomedical science	master students, doctoral students, junior researchers	attitude/behaviour, awareness	standalone/group	active	scrupulousness, reliability, verifiability, impartiality, and independence/ negligence	the Netherlands code of conduct	N/A	English	more than 30 min	final assignment at the end of each session	N/A	N/A
RRI Self-reflection tool	on line training	Europe	RRI Tools	N/A	https://www.rri-tools.eu/self-reflection-tool	N/A	moral reasoning, behavioural ethics	no customization	bachelor students, master students, doctoral students, junior researchers, trainers	attitude/behaviour, awareness	standalone/group	active	N/A	N/A	(https://www.rri-tools.eu/documents/10184/265698/SRT-BlankSheet/56970b0c-49a4-401a-b69b-7ff4ea7fcf74) (https://www.rri-tools.eu/documents/10184/94414/SRT-HowItWorks.pdf/06e0ff71-897c-41cb-887f-6074decbc307) (https://www.fosteropenscience.eu/sites/default/files/pdf/4333.pdf )	English	N/A	N/A	N/A	N/A
Human subject research	online training	US	ORI	N/A	https://ori.hhs.gov/index.php/human-subject-research	N/A	research with humans	biomedical science, social sciences	bachelor students, master students, doctoral students, junior researchers, senior researchers	knowledge	standalone	active/passive	N/A	general guidelines	N/A	English	N/A	N/A	N/A	N/A
Online learning tool for RI and image processing	online training	US	University of Alabama	2008	https://ori.hhs.gov/education/products/RIandImages/default.html	N/A	image manipulation	no customization	bachelor students, master students, doctoral students, junior researchers, senior researchers, professors, principal investigators	awareness, knowledge	standalone	active/passive	N/A	guidelines	N/A	English	N/A	N/A	N/A	N/A
Research Integrity OSF	online training	Italy	Ospedale San Raffaele	N/A	http://research.hsr.it/en/research-integrity/overview.html	N/A	authorship, data management, plagiarism, image manipulation, conflict of interest, mentor/trainee relationship, research misconduct, questionable research practices	biomedical science	doctoral students, junior researchers, senior researchers, professors, principal investigators	attitude/behaviour, knowledge, skills	standalone	active/passive	reliability, honesty, respect, accountability	http://research.hsr.it/static/upload/rio/rio001-0researchintegrityguidelines.pdf	N/A	English	N/A	N/A	N/A	N/A
Publication/Authorship	online training	US	ORI	N/A	https://ori.hhs.gov/publicationsauthorship	N/A	authorship, publication ethics	no customization	bachelor students, master students, doctoral students, junior researchers, senior researchers	knowledge	standalone	active/passive	N/A	ICMJE guideline	N/A	English	N/A	N/A	N/A	N/A
COPE core practices	online training	UK	COPE	N/A	https://publicationethics.org/core-practices	N/A	publication ethics, research misconduct, authorship, conflict of interest, data management, reproducibility, peer review, intellectual property, allegation of misconduct	no customization	bachelor students, master students, doctoral students, junior researchers, senior researchers, professors, principal investigators	knowledge, skills	standalone	active/passive	N/A	international guidelines regarding publication issues	N/A	English	N/A	N/A	for the e-learning section	N/A
Understanding Research Ethics Through Case Examples―The Attitude of the Conscientious Scientist	online training	Japan	Japan society for the promotion of science	N/A	https://www.netlearning.co.jp/clients/JSPS/top.aspx	N/A	research misconduct, authorship, financial rensponsibilities, conflict of interest, societal responsibilities, safety	no customization (mainly biomedical science)	bachelor students, master students, doctoral students, junior researchers, senior researchers, professors, principal investigators	attitude/behaviour, awareness, knowledge, skills	standalone	active/passive	honesty, trustworthyness, transparency, raising awareness	japanese guidelines on misconduct	N/A	English, Japanese	1h/30 min.	N/A	N/A	N/A
Academic integrity at MIT, a handbook for students	online training	US	MIT	2018	https://integrity.mit.edu/	N/A	plagiarism, citing, paraphrasing	no customization	bachelor students, master students	awareness, knowledge	standalone	active/passive	N/A	N/A	N/A	English	N/A	N/A	N/A	N/A
Academic integrity tutorial with quiz	online training	US	University of Maryland	N/A	https://www.umuc.edu/current-students/learning-resources/academic-integrity/tutorial/interactive.html	N/A	plagiarism	no customization	bachelor students, master students	skills	standalone	active/passive	honesty	N/A	N/A	English	N/A	N/A	N/A	N/A
Animal resources	online training	US	ORI	N/A	https://ori.hhs.gov/animal-resources	N/A	research with animals	biomedical science	bachelor students, master students, doctoral students, junior researchers, senior researchers	knowledge	standalone	active/passive	N/A	guidelines	N/A	English	N/A	N/A	N/A	N/A
Collaborative science	online training	US	ORI	N/A	https://ori.hhs.gov/collaborative-science-0	N/A	collaborative science	no customization	bachelor students, master students, doctoral students, junior researchers, senior researchers	knowledge	standalone	active/passive	N/A	guidelines	N/A	English	N/A	N/A	N/A	N/A
Conflict of interest and commitment	online training	US	ORI	N/A	https://ori.hhs.gov/index.php/conflicts-interest-and-commitment	N/A	conflict of interest	no customization	bachelor students, master students, doctoral students, junior researchers, senior researchers	knowledge	standalone	active/passive	N/A	guidelines	N/A	English	N/A	N/A	N/A	N/A
Data management	online training	US	ORI	N/A	https://ori.hhs.gov/data-management	N/A	data management	no customization	bachelor students, master students, doctoral students, junior researchers, senior researchers	knowledge	standalone	active/passive	N/A	guidelines	N/A	English	N/A	N/A	N/A	N/A
E-course on plagiarism for students	online training	The Netherlands	Radbound University	2018	https://www.ru.nl/library/library/library-locations/library-science/news/library-science/learning-modules-about-plagiarism-teaching/	N/A	plagiarism, citing, paraphrasing	no customization	bachelor students, master students	skills	standalone	active/passive	N/A	N/A	N/A	English	N/A	N/A	N/A	N/A
Instruction in RCR-postdocs,IRTA,CRTA,VF, research associate	online training	US	NIH	N/A	https://oir.nih.gov/sourcebook/ethical-conduct/responsible-conduct-research-training/instruction-responsible-conduct-research-postdoc-irta-crta-vf-research	N/A	research misconduct, questionable research practices, reproducibility, research with animals, research with human, authorship, publication ethics, data management	biomedical science	doctoral students, junior researchers	attitude/behaviour, knowledge, skills	standalone	active/passive	N/A	N/A	N/A	English	N/A	N/A	N/A	N/A
Introduction to publication ethics	online training	UK	COPE	N/A	https://publicationethics.org/resources/elearning/introduction-publication-ethics-0	N/A	plagiarism, authorship	no customization	bachelor students, master students, doctoral students, junior researchers, senior researchers, professors, principal investigators	knowledge	standalone	active/passive	trustworthyness, institution's reputation, corruption	COPE guidelin	N/A	English, Spanish	20 min	N/A	Yes	N/A
Mantra (research data management training)	online training	UK	University of Edinburg	N/A	https://mantra.edina.ac.uk/	N/A	data management	no customization	bachelor students, master students, doctoral students, junior researchers, senior researchers, professors, principal investigators	knowledge, skills	standalone	active/passive	N/A	N/A	N/A	English	N/A	N/A	system of rating	N/A
Mentor/mentee training materials	online training	US	Centre for the improvement of mentored experiences in research	N/A	https://cimerproject.org/#/curricula/training-materials	N/A	mentor/trainee relationship	biomedical science, humanities, social sciences, engineering, natural sciences and physics	bachelor students, master students, doctoral students, junior researchers, senior researchers, professors, principal investigators, trainers	attitude/behaviour, knowledge, skills	standalone	active/passive	N/A	N/A	N/A	English	N/A	N/A	N/A	N/A
Mentorship	online training	US	ORI	N/A	https://ori.hhs.gov/index.php/mentorship	N/A	mentor/trainee relationship	no customization	bachelor students, master students, doctoral students, junior researchers, senior researchers	knowledge	standalone	active/passive	N/A	N/A	N/A	English	N/A	N/A	N/A	N/A
On being a scientist	online training	The Netherlands	Leiden University	2018	https://www.coursera.org/learn/scientist	N/A	research misconduct, questionable research practices,data management, conflict of interest, social responsibilities, authorship, publication ethics, mentor/trainee relationship	no customization	bachelor students, master students	attitude/behaviour, knowledge, awareness	standalone	active/passive	honesty, fairness, trustworthyness	N/A	N/A	English (sub. Greek)	26h/ 5 weeks	N/A	system of rating	N/A
Open learning research ethics	online training	Finland	Finnish doctoral training network	N/A	https://findocnet.fi	N/A	research misconduct, data management, financial responsibilities, authorship, publication ethics, mentor/trainee relationaship	no customization	doctoral students	attitude/behaviour, awareness, knowledge, skills	standalone	active/passive	honesty, fairness, trustworthyness, integrity, meticolousness, accuracy	finnish codes	N/A	English, Finnsh	N/A	final assignments	N/A	N/A
Peer review	online training	US	ORI	N/A	https://ori.hhs.gov/index.php/peer-review-0	N/A	peer review	no customization	bachelor students, master students, doctoral students, junior researchers, senior researchers	knowledge	standalone	active/passive	N/A	N/A	N/A	English	N/A	N/A	N/A	N/A
Plagiarism awareness	online training	UK	Imperial Colloge London	N/A	https://www.imperial.ac.uk/admin-services/library/learning-support/plagiarism-awareness/undergraduates/ (no free available)	N/A	plagiarism	no customization	bachelor students, master students, doctoral students, junior researchers, senior researchers, professors, principal investigators, asministrattive sector	knowledge, skills	standalone	active/passive	N/A	N/A	N/A	English	N/A	final assignments	N/A	N/A
Plagiarism prevention	online training	Germany	Konstanz University	N/A	https://www.plagiatspraevention.uni-konstanz.de/en/educational-material/	N/A	plagiarism	no customization	bachelor students, master students, doctoral students	awareness, knowledge	standalone	active	N/A	N/A	N/A	German	N/A	N/A	N/A	N/A
RCR	online training	US	CITI program	2007	N/A	N/A	research misconduct, questionable research practices, mentor/trainee relationship, research with humans, research with animals, data managemet, financial responsibilities, work environment, authorship, peer review, social responsabilities, environmental responsibilities	biomedical science, humanities, social sciences, engineering, natural sciences and physics, administrative sector	bachelor students, master students, doctoral students, junior researchers	attitude/behaviour, awareness, knowledge, skills	standalone	active/passive	honesty, fairness	US guidelines	N/A	English	N/A	final assignments	N/A	N/A
RCR refresh	online training	US	CITI program	2007	N/A	N/A	research misconduct, questionable research practices, mentor/trainee relationship, research with humans, research with animals, data managemet, financial responsibilities, work environment, authorship, peer review, social responsabilities	biomedical science, humanities, social siences, engineering, natural sciences and physics	senior researhcers, professors, principal investigators	attitude/behaviour, awareness, knowledge, skills	standalone	active/passive	honesty, fairness	US guidelines	N/A	English	N/A	final assignments	N/A	N/A
Research misconduct	online training	US	ORI	N/A	https://ori.hhs.gov/research-misconduct	N/A	research misconduct	no customization	bachelor students, master students, doctoral students, junior researchers, senior researchers	knowledge	standalone	active/passive	N/A	US guidelines	N/A	English	N/A	N/A	N/A	N/A
Resources for training directors	online training	US	NIH	N/A	https://oir.nih.gov/sourcebook/ethical-conduct/responsible-conduct-research-training/resources-training-directors	N/A	research with humans, research with animals, research misconduct, publication ethics, authorship, data management, collaborative research, conflict of interest, peer review	biomedical science	senior researchers, principal investigators, professors	attitude/behaviour, knowledge, skills	standalone	active/passive	N/A	US guidelines	N/A	English	N/A	final assignments	N/A	N/A
WHERE IS THE BORDERLINE BETWEEN POOR ACADEMIC PRACTICE AND PLAGIARISM?	online training	Europe	ENAI	2018	http://www.academicintegrity.eu/wp/materials/where-is-the-borderline-between-poor-academic-practice-and-plagiarism/	N/A	plagiarism	no customization	trainers	skills	standalone/group	active/passive	N/A	N/A	N/A	English	N/A	N/A	N/A	N/A
Administrators and RCR	online training	US	Boston college	N/A	https://ori.hhs.gov/education/products/rcradmin/index.html	N/A	conflist of interest, financial responsibilities, mentor/trainee relationship, collaborative research, data management	administrative sector	administrative staff	attitude/behaviour, awareness, knowledge, skills	standalone	active/passive	N/A	policies	N/A	English	N/A	N/A	N/A	N/A
Basic research concept for new research staff	online training	US	University of California (San Diego)	N/A	https://ori.hhs.gov/content/basic-research-concepts-brc	N/A	data management	no customization	bachelor students, master students, doctoral students	attitude/behaviour, awareness, knowledge, skills	standalone	active/passive	N/A	RE, RI international	N/A	English, Spanish	N/A	final assignments	N/A	N/A
Online research ethics course	online training	US	University of Montana	2003	https://ori.hhs.gov/education/products/montana_round1/research_ethics.html	N/A	research misconduct, questionable research practices, institutional responsibilities, professional responsibilities, research with humans, research with animals,	no customization	bachelor students, master students, doctoral students, junior researchers	attitude/behaviour, awareness, knowledge, skills	standalone	active/passive	N/A	RE, RI international	N/A	English	N/A	final assignments	N/A	N/A
ORI introduction to RCR	online training	US	Office of Research Integrity (ORI)	2007	https://ori.hhs.gov/index.php/general-resources	N/A	research misconduct, questionable research practices, mentor/trainee relationship, research with humans, research with animals, data managemet, financial responsibilities, work environment, authorship, peer review, social responsabilities	biomedial science, social sciences	bachelor students, master students, doctoral students, junior researchers, senior researchers, professors, principal investigators	attitude/behaviour, awareness, knowledge, skills	standalone	active/passive	honesty, accuracy,efficiency, objectivity	RE, RI international	N/A	English	N/A	final assignments	N/A	N/A
Reseaech integrity basic	online training	UK	EPIGEUM	2012	N/A	N/A	research misconduct, questionable research practices, collaborative research, research with humans, research with animals, data managemet, financial responsibilities, work environment, authorship, peer review, social responsibilities	biomedical science, humanities, social siences, engineering, natural sciences and physics	bachelor students, master students, doctoral students, junior researchers, trainers	attitude/behaviour, awareness, knowledge, skills	standalone	active/passive	honesty, accountability, professional curtesy, good stewardship	RE, RI international	https://www.epigeum.com/custom/uploads/2015/06/RI_Supplement_AU_FINAL_PDF.pdf	English	5h core activities, 25/32h additional activities	final assignments	N/A	N/A
Research integrity concise	online training	UK	EPIGEUM	2016	N/A	N/A	Intellectal property, conflict of interest, safety, research with humans, research with animals, research misconduct, questionable research practices	no customization	senior researhcers, professors, principal investigators	attitude/behaviour, awareness, knowledge, skills	standalone	active/passive	honesty, accountability, professional curtesy, good stewardship	RE, RI international	N/A	English	45 min. caore activities, 1h optional activities	N/A	N/A	N/A
RCR- lab management	online training	US	Washington state University	N/A	https://ori.hhs.gov/education/products/wsu/index.html	N/A	research misconduct, questionable research practices, safety, mentor/trainee relationship, data management, financial responsibilities, writing skills	biomedical science	junior researchers, senior researchers, principal investigators, administrative staff	attitude/behaviour, awareness, knowledge, skills	standalone	active/passive	N/A	RE,RI guidelines	N/A	English	N/A	N/A	N/A	N/A
Research ethics: a novel approach	online training	US	Office of Research Integrity (ORI)	2001	https://ori.hhs.gov/education/products/NovelApproach/credits.htm	N/A	research misconduct, questionable research practices, authorship, mentor/trainee relationship, research with humans, research with animals, data management, conflict of interest, patenting, financial responsibilities, social responsibilities, whistleblowing,	no customization	bachelor students, master students, doctoral students	attitude/behaviour, awareness, knowledge, skills	standalone	active/passive	N/A	RE,RI guidelines	N/A	English	N/A	N/A	N/A	N/A
Resources for research ethics education	online training	US	UC San Diego	last update 2010	http://research-ethics.org/topics/overview/	N/A	research misconduct, authorship, data management, research with humans, research with animals, biosecurity, societal responsibilities, peer review, stem cell researchm whistleblowing	no customization	bachelor students, master students, doctoral students, junior researchers, senior researchers, professors, principal investigators	attitude/behaviour, awareness, knowledge, skills	standalone	active/passive	N/A	RE,RI guidelines	N/A	English	N/A	final assignments	N/A	N/A
Responsible conduct of research	online training	US	Columbia University	2003	http://ccnmtl.columbia.edu/projects/rcr/index.html	N/A	conflict of interest, mentor/trainee relationship, peer review, research misconduct, collaborative research data management	no customization	bachelor students, master students, doctoral students, junior researchers	attitude/behaviour, awareness, knowledge, skills	standalone	active/passive	N/A	RE,RI guidelines	N/A	English	N/A	final assignments	N/A	N/A
The research ethics library	online training	Norway	The Norvegian National REC	N/A	https://www.etikkom.no/en/library	N/A	research misconduct, authorship, data management, research with humans, research with animals, environmental responsibilities, societal responsibilities	no customization	bachelor students, master students, doctoral students, junior researchers, senior researchers, professors, principal investigators, trainers, administative staff	attitude/behaviour, awareness, knowledge, skills	standalone	active/passive	N/A	RE,RI guidelines	https://www.etikkom.no/en/library/resources/quick-guide-to-course-design/	English, Norwegian	N/A	N/A	N/A	N/A
RCR	online training	US	University of NewHampshire	N/A	https://rit.sr.unh.edu/training/rcr.shtml	N/A	authorship, research with humans, research with animals, safety, collaborative research, conflict of interest, data management, mentor/trainee relationship, peer review, research misconduct, social responsibility, intellectual property, reproducibility	biomedical sciences	bachelor students, master students, doctoral students, junior researchers, senior researchers, professors, principal investigators	attitude/behaviour, awareness, knowledge, skills	standalone	active/passive	N/A	RI guidelines	N/A	English	N/A	final assignments	N/A	N/A
RCR and scholar activity	online training	US	University of NewHampshire	last update 2019	http://libraryguides.unh.edu/RCR	N/A	authorship, research with humans, research with animals, biosecurity, collaborative research, conflict of interest, data management, mentor/trainee relationship, peer review, research misconduct, social responsibility, intellectual property, reproducibility	biomedical sciences	bachelor students, master students, doctoral students, junior researchers, senior researchers, professors, principal investigators	attitude/behaviour, awareness, knowledge, skills	standalone	active/passive	N/A	RI guidelines	N/A	English	N/A	final assignments	N/A	N/A
Printeger Upright	online training	Europe	Printeger EU project	N/A	https://printeger.eu/upright/toc/	N/A	research misconduct, peer review, authorship, open acces, research with animals, conflict of interest, data management	biomedical sciences	bachelor students, master students, doctoral students, junior researchers, senior researchers, professors, principal investigators	attitude/behaviour, awareness, knowledge, skills	standalone	active/passive	reliability, honesty, respect, accountability	RI guidelines (PRINTEGER statement)	N/A	English	N/A	N/A	N/A	N/A
The online ethics center (OEC)	online training (collection of materials)	US	National academy of engineering	N/A	https://www.onlineethics.org/Topics/29511.aspx	N/A	research misconduct, questionable research practices, authorship, peer review, publication ethics, mentor/trainee relationship, collaborative research, research with humans, research with animals, data management, conflict of interest, patenting, reproducibility, financial responsibilities, social responsibilities, safety, work environment, grant application, allegation of misconduct, open access…	biomedical science, engineering, natural science and physics	bachelor students, master students, doctoral students, junior researchers, senior researchers, professors, principal investigators	attitude/behaviour, awareness, knowledge, skills	standalone/group	active/passive	N/A	N/A	N/A	English	N/A	N/A	N/A	N/A
Responsible research - guide to research integrity, research ethics and science communication in finland	online training (collection of materials)	Finland	Finnish national board on research integrity	N/A	https://www.vastuullinentiede.fi/en	N/A	research misconduct, collaborative research, conflict of interest, copyright, data management, social responsibilities, open science, peer review, plagiarism, publication ethics,	no customization	bachelor students, master students, doctoral students, junior researchers, senior researchers, professors, principal investigators, trainers, administative staff	attitude/behaviour, knowledge	standalone	active/passive	honesty, fairness, trustworthyness, integrity, meticolousness, accuracy	RE, RI international, TENK statement	N/A	English, Finnish, Swedish	N/A	N/A	N/A	N/A
HEIRRI training programmes	online training collection	Europe	Heirri project	N/A	http://heirri.eu/resources/heirri-at-rritools-eu/	N/A	responsible research	no customization	doctoral students, junior researchers, trainers	attitude/behaviour, knowledge, skills	standalone	active/passive	N/A	N/A	notes for instructors	English, Spanish	N/A	N/A	N/A	N/A
Resources for training directors	online training, guidance, case studies	US	NIH (national institute of health)	N/A	https://oir.nih.gov/sourcebook/ethical-conduct/responsible-conduct-research-training/resources-training-directors	N/A	research with humans, authorship, publication ethics, research with animals, research misconduct, mentor/trainee relationship, data management, collaborative research, conflict of interest, peer review	biomedical science	senior researchers, professors, principal investigators, trainers, administative staff	attitude/behaviour, awareness, knowledge, skills	standalone/group	active/passive	N/A	NIH guidelines	https://ori.hhs.gov/images/ddblock/Instructor's%20Manual_Final_edited.pdf	English	N/A	pre-training and post-training survey	N/A	N/A
Research and practices	online training, role-play scenarios, case studies, textbook, guidances, reports	US	The online ethics center (OEC)	N/A	https://www.onlineethics.org/Topics/29511.aspx	N/A	research with animals, collaborative research, conflict of interest, data management, grant application, research with humans, intellectual property, patenting, mentor/trainee relationaship, publication ethics, research misconduct, safety, work environment	biomedical science, engineering, natural science and physics	bachelor students, master students, doctoral students, junior researchers, senior researchers, professors, principal investigators, trainers, administative staff	attitude/behaviour, awareness, knowledge, skills	standalone/group	active/passive	N/A	N/A	notes for instructors	English	N/A	N/A	N/A	N/A
General resources	online training, textbook, videos, case studies	US	ORI	N/A	https://ori.hhs.gov/general-resources	N/A	RCR	no customization	bachelor students, master students, doctoral students, junior researchers, senior researchers	knowledge	standalone/group	active/passive	N/A	US guidelines	N/A	English	N/A	N/A	N/A	N/A
Mentoring international postdocs	online training, video	US	ORI	N/A	https://ori.hhs.gov/mentoring-international-post-docs	N/A	mentor/trainee relationaship	no customization	senior researchers, professors, principal investigators, trainers	attitude/behaviour, knowledge, skills	standalone	active/passive	N/A	N/A	https://ori.hhs.gov/rcr/CHOP_VideoGuide.pdf	English	N/A	N/A	N/A	N/A
3 things societies can do to promote research integrity	podcasts	N/A	The Wiley network	2016	https://soundcloud.com/wileysocietyupdates/episode-6-3-things-societies-can-do-to-promote-research-integrity	N/A	reproducibility, COI, publication ethics, data management	no customization	bachelor students, master students, doctoral students, junior researchers, senior researchers, professors, principal investigators	awareness, knowledge	standalone	passive	openess, integrity, transparency, credibility and reproducibility	N/A	N/A	English	13:07:00	N/A	system of rating	available
Bioethics: an introduction	podcasts	UK	University of Oxford	2012	https://podcasts.ox.ac.uk/series/bioethics-introduction	N/A	moral reasoning, behavioural ethics	biomedical science	bachelor students, master students, doctoral students	awareness, knowledge	standalone	passive	N/A	N/A	N/A	English	10 episodes around 15 min each	N/A	N/A	N/A
Critical reasoning for beginners	podcasts	UK	University of Oxford	2010	https://podcasts.ox.ac.uk/series/critical-reasoning-beginners	N/A	moral reasoning, behavioural ethics	no customization	bachelor students, master students, doctoral students	awareness, knowledge	standalone	passive	N/A	N/A	N/A	English	7 episodes	N/A	N/A	N/A
Dr. Stuart Buck on research integrity	podcasts	N/A	research in action/ Oregon state university	N/A	https://ecampus.oregonstate.edu/research/podcast/e87	N/A	research misconduct	biomedical science	bachelor students, master students, doctoral students, junior researchers, senior researchers, professors, principal investigators, trainers	attitude/behaviour, awareness, knowledge	standalone	passive	N/A	N/A	https://ecampus.oregonstate.edu/research/wp-content/uploads/Episode-87-Podcast-Instructor-Guide.pdf	English	around 40 min	N/A	N/A	N/A
Misconduct and Fraud in in clinical research	podcasts	UK	NIH ,Allan Gaw, University of Leeds	2018	https://soundcloud.com/allangaw/podcast-7-allan-and-richard-smith-discuss-research-misconduct	N/A	research misconduct, COI, data management	biomedical science	bachelor students, master students, doctoral students, junior researchers, senior researchers, professors, principal investigators	attitude/behaviour, awareness	standalone	passive	reproducibility, trust	N/A	N/A	English	11:31:00	N/A	system of rating	available
Nine pitfalls of research misconduct	podcasts	N/A	Nature podcast series (2018)	2018	https://www.nature.com/articles/d41586-018-05145-6	doi: 10.1038/d41586-018-05145-6	research misconduct, mentor/trainee relationship	no customization	bachelor students, master students, doctoral students, junior researchers, senior researchers, professors, principal investigators	attitude/behaviour, awareness	standalone	passive	reliability	N/A	N/A	English	06:30:00	N/A	N/A	N/A
Peer review is broken(or is it?)	podcasts	N/A	The Wiley network	2017	https://hub.wiley.com/community/exchanges/discover/blog/2017/05/23/peer-review-is-broken-or-is-it?referrer=exchanges	N/A	peer review, publication ethics	no customization	junior researchers, senior researchers, professors, principal investigators	awareness	standalone	passive	N/A	N/A	N/A	English	11:49:00	N/A	N/A	N/A
Research Integrity series	podcasts	UK	University of Oxford	2001-2009	https://podcasts.ox.ac.uk/series/research-integrity	N/A	publication ethics, data management, research misconduct, questionable research practices,	biomedical science	bachelor students, master students, doctoral students, junior researchers,	awareness, knowledge	standalone	passive	transparency, accurancy	N/A	N/A	English	9 podcast, around 45 min each	N/A	N/A	N/A
The search for reproducibility	podcasts	N/A	The Wiley network	2017	https://hub.wiley.com/community/exchanges/discover/blog/2017/07/20/the-search-for-reproducibility?referrer=exchanges&elq_mid=19660&elq_cid=249106&hootPostID=c2461c6102cb75d19cd3c1f7c891f2b5	N/A	reproducibility, publication ethics, datamanagement, open science	biomedical science, natural science and physics	bachelor students, master students, doctoral students, junior researchers, senior researchers, professors, principal investigators	attitude/behaviour, awareness	standalone	passive	reproducibility, trustworthyness, transparency	N/A	N/A	English	07:37:00	N/A	N/A	N/A
Wiley society podcast series	podcasts	N/A	The Wiley network	2016	https://soundcloud.com/wileysocietyupdates	N/A	publication ethics	no customization	bachelor students, master students, doctoral students, junior researchers, senior researchers, professors, principal investigators	awareness, knowledge	standalone	passive	N/A	N/A	N/A	English	N/A	N/A	system of rating	available
Dr. Jim Kroll on research misconduct	podcasts	N/A	research in action/ Oregon state university	N/A	https://ecampus.oregonstate.edu/research/podcast/e5/	N/A	research misconduct, allegation of misconduct, peer review, grant application	biomedical science	bachelor students, master students, doctoral students, junior researchers, senior researchers, professors, principal investigators, trainers	attitude/behaviour, awareness	standalone	passive/ examples in bonus track	honesty, fairness	NFS guidelines	https://ecampus.oregonstate.edu/research/wp-content/uploads/Episode-5-Podcast-Instructor-Guide-1.pdf	English	40min in total	N/A	N/A	N/A
PPT presentations 3rd WCRI 2010	PPT presentations	Worldwide	WRCI	2010	https://wcrif.org/2010-resources/2010-conference-materials	N/A	N/A	no customization	bachelor students, master students, doctoral students, junior researchers, senior researchers, professors, principal investigators	attitude/behaviour, knowledge	standalone	passive	N/A	N/A	N/A	English	N/A	N/A	N/A	N/A
PPT presentations 5th WCRI 2017	PPT presentations	Worldwide	WCRI	2017	https://wcrif.org/2017-powerpoint-presentations	N/A	N/A	no customization	bachelor students, master students, doctoral students, junior researchers, senior researchers, professors, principal investigators	attitude/behaviour, knowledge	standalone	passive	N/A	N/A	N/A	English	N/A	N/A	N/A	N/A
Plenaries 4th WRCI 2015	ppt presentations, video	Worldwide	WRCI	2015	https://wcrif.org/2015-plenaries	N/A	N/A	no customization	bachelor students, master students, doctoral students, junior researchers, senior researchers, professors, principal investigators	attitude/behaviour, knowledge	standalone	passive	N/A	N/A	N/A	English	N/A	N/A	N/A	N/A
Fostering research integrity in Europe	report	Europe	European science foundation	2010	https://oeawi.at/wp-content/uploads/2018/09/ESF-research-integrity-report.pdf	N/A	N/A	no customization	senior researchers, professors, principal investigators, trainers, administative staff	awareness	standalone	passive	honesty, reliability, objectivity, impartiality, independence, openess, fairness, responsibilities	European code of conduct for research integrity	N/A	English	N/A	N/A	N/A	N/A
Good scientific practice for courses in science and medicine	report	Germany	Gerlinde Sponholz	2011	http://www.ombudsman-fuer-die-wissenschaft.de/fileadmin/Ombudsman/Dokumente/Downloads/Curriculum/German_Curriculum.pdf	N/A	N/A	biomedical science	professors, principal investigators, trainers, administrative staff	awareness	standalone	passive	N/A	N/A	N/A	English	N/A	N/A	N/A	N/A
Report stakeholders	report	Europe	ENERI	2017	http://eneri.eu/wp-content/uploads/2018/06/Report-Stakeholder-Workshop-Athens.pdf	N/A	N/A	no customization	professors, principal investigators, trainers administrative staff	awareness, knowledge	standalone	passive	N/A	N/A	N/A	English	N/A	N/A	N/A	N/A
Reproducibility and reliability of biomedical research: improving research practices	report	UK	the academy of biomedical science, BBSRC, Medical research council, wellcometrust	2015	https://acmedsci.ac.uk/viewFile/56314e40aac61.pdf	N/A	reprobucibility	no customization	senior researchers, professors, principal investigators, trainers, administative staff	awareness	standalone	passive	openess, transparency, collaboration, reproducibility	N/A	N/A	English	N/A	N/A	N/A	N/A
Research integrity and research misconduct policy	report	Australia	Australian research council	2017	https://www.arc.gov.au/policies-strategies/strategy/arc-research-integrity-and-research-misconduct-policy	N/A	research misconduct, questionable research practices, data management, authorship, conflict of interest, mentor/trainee relationship, grant application	no customization	professors, principal investigators, trainers administrative staff	awareness, knowledge	standalone	passive	transparency, integrity	Australian code for RCR	N/A	English	N/A	N/A	N/A	N/A
Responsible conduct in global research enterprise	report	Europe	Interacademy council	2012	http://www.interacademies.org/33362.aspx	N/A	research misconduct, questionable research practices	no customization	senior researchers, professors, principal investigators, trainers, administative staff	awareness	standalone	passive	honesty, fairness, objectivity, reliability, skepticism, accountability, openess	N/A	N/A	English, German, Chinese, Japanese, Arabic	N/A	N/A	N/A	N/A
Safeguarding good scientific practices	report	Germany	DFG (Deutsche Forschungsgemeinschaft)	2013	https://www.dfg.de/en/research_funding/principles_dfg_funding/good_scientific_practice/index.html	N/A	N/A	no customization	doctoral students, junior researchers, senior researchers, professors, principal investigators	awareness	standalone	passive	honesty,	guideline	N/A	English, German	N/A	N/A	N/A	N/A
The concordat to support research integrity	report	UK	several English signatoires	2012	https://www.universitiesuk.ac.uk/policy-and-analysis/reports/Documents/2012/the-concordat-to-support-research-integrity.pdf	N/A	N/A	no customization	senior researchers, professors, principal investigators, trainers, administative staff	awareness	standalone	passive	integrity, rigour, transparency, fairness	N/A	https://ukrio.org/wp-content/uploads/UKRIO-Self-Assessment-Tool-for-The-Concordat-to-Support-Research-Integrity-May-2014-1.pdf	English	N/A	N/A	N/A	N/A
Tri-agency framework:RCR	report	Canada	Panel on Responsible conduct of research	2016	http://www.rcr.ethics.gc.ca/eng/policy-politique/framework-cadre/	N/A	research misconduct, data managemet, authorship, conflict of interest, grant application	no customization	professors, principal investigators, trainers administrative staff	awareness, knowledge	standalone	passive	accountability, transparency, trust, honesty, transparency	guidelines	N/A	English	N/A	N/A	N/A	N/A
Research integrity practices in scince europe member organizations	report	Europe	ScienceEurope	2016	https://www.scienceeurope.org/wp-content/uploads/2016/07/Science-_Europe_Integrity_Survey_Report_July_2016_FINAL.pdf	N/A	N/A	no customization	senior researchers, professors, principal investigators, trainers, administative staff	awareness	standalone	passive	trustworthyness, integrity	singapore statement, ALLEA code	N/A	English	N/A	N/A	N/A	N/A
2MCs for students	role-play scenarios	US	NCPRE (National Centre for Professional & Research Ethics)	N/A	https://ethicscenter.csl.illinois.edu/research-ethics-resources/role-specific-resources/resources-for-instructors/two-minute-challenges/2mcs-for-students/	N/A	authorship, intellectual property, allegation of misconduct, research misconduct, whistleblowing,	engineering	bachelor students, master students, trainers	attitude/behaviour, awareness	group	active	N/A	N/A	http://ethicscenter.csl.illinois.edu/files/2018/09/2MC-methodology.pdf	English	N/A	N/A	N/A	N/A
NCPRE research role-ply scenarios	role-play scenarios	US	NCPRE (National Centre for Professional & Research Ethics)	N/A	http://ethicscenter.csl.illinois.edu/research-ethics-resources/educational-materials/active-learning-exercises/	15 for each scenario	authorship, conflict of interest, research with humans, mentor/trainee relationship, safety, peer review, research with animal, data management, whistleblowing	engineering	bachelor students, master students, doctoral students, trainers	attitude/behaviour, awareness	group	active	N/A	N/A	notes for instructors	English	N/A	N/A	N/A	N/A
Role-play scenarios for teaching RCR	role-play scenarios	US	The online ethics center (OEC)	2016	https://www.onlineethics.org/Resources/RCRroleplays.aspx	N/A	research with animals, authorship, conflict of interest, hazardous substances, research with humans, mentor/trainee relationaship, peer review, data management, whistleblowing	biomedical science, engineering, natural science and physics	bachelor students, master students, doctoral students, junior researchers, trainers	attitude/behaviour, awareness	group	active	N/A	N/A	notes for instructors	English	N/A	N/A	N/A	N/A
Scenarios for ethics modules in RCR	role-play scenarios	US	The online ethics center (OEC)	2015	https://www.onlineethics.org/Topics/RespResearch/ResCases/ethicsmodscen.aspx	N/A	data management, research with humans, authorship, grant application, mentor/trainee relationship, research using animals, safety,	biomedical science, humanities, social siences, engineering, natural sciences and physics	bachelor students, master students, doctoral students, junior researchers, trainers	attitude/behaviour, awareness	group	active	N/A	N/A	notes for instructors	English	N/A	N/A	N/A	N/A
RCR- A Danish textbook for courses in RCR	textbook	Denmark	University of Copenhagen	2018	https://ifro.ku.dk/rcr.pd	N/A	research misconduct, questionable research practices, authorship, publication ethics, data management, intellectual property, conflict of interest, social responsibility	no customization	bachelor students, master students, doctoral students	awareness, knowledge, skills	standalone	active/passive	honesty, transparency, accountability, professional courtesy, good stewardship	Danish code of conduct for research integrity, international guidelines	N/A	English	N/A	final assignment at the end of each session	N/A	N/A
Responsible conduct of research and procedure for handling allegations of misconduct in Finland	textbook	Finland	Finnish advisory board on research integrity	2012	https://www.tenk.fi/sites/tenk.fi/files/HTK_ohje_2012.pdf	N/A	allegation of misconduct	no customization	bachelor students, master students, doctoral students, junior researchers, senior researchers, professors, principal investigators, trainers, administative staff	awareness, knowledge	standalone	passive	N/A	guidelines on allegation of misconduct	N/A	English, Finnish, Swedish	N/A	N/A	N/A	N/A
Doing Global science	textbook	US	Princeton University press	2015	https://www.researchgate.net/publication/305496842_Doing_Global_Science_A_Guide_to_Responsible_Conduct_in_the_Global_Research_Enterprise	N/A	mentor/trainee relationship, plagiarism, peer review, collaborative research, research with humans, data management, open science, social responsibility, safety and environment, allegation of misconduct, conflict of interest, authorship,	biomedical science	bachelor students, master students, doctoral students, junior researchers,	attitude/behaviour, knowledge, awareness	standalone	active/passive	honesty, fairness, objectivity, reliability, skepticism, accountability, openess	international guidelines	N/A	English	N/A	N/A	N/A	N/A
A guide to training and mentoring in the intramural research program at NIH	textbook	US	NIH	N/A	https://oir.nih.gov/sites/default/files/uploads/sourcebook/documents/mentoring/guide-training_and_mentoring-10-08.pdf	N/A	mentor/trainee relationship	no customization	senior researchers, professors, principal investigators, trainers, administative staff	attitude/behaviour, awareness, knowledge	standalone	passive	productivity, reliability	guideline for mentorship	N/A	English	N/A	N/A	N/A	N/A
A guidebook for teaching selected responsible conduct of research topics to a culturally diverse trainee group	textbook	US	Madeline Alexander, Wendy Reed Williams, the Children's Hospital of Philadelphia	N/A	https://ori.hhs.gov/images/ddblock/Alexander.RCR%20Guidebook.BW_.pdf	N/A	data management, intellectual property, research misconduct	no customization	trainers	attitude/behaviour, knowledge, skills	standalone	active/passive	N/A	N/A	N/A	English	N/A	final assignment at the end of each session	N/A	N/A
Academic integrity at MIT, a handbook for students	textbook	US	MIT	N/A	https://integrity.mit.edu/sites/default/files/documents/AcademicIntegrityHandbook2018-color.pdf	N/A	plagiarism	no customization	bachelor students, master students	knowledge	standalone	passive	N/A	N/A	N/A	English	N/A	N/A	N/A	N/A
Best practices in graduate education for the responsible conduct of research	textbook	US	Council of graduate school	2008	file:///C:/Users/u0123179/Downloads/FS_Best_Practices_Research.pdf	N/A	research misconduct, questionable research practices	no customization	trainers	attitude/behaviour, knowledge, skills	standalone	active/passive	transparency, honesty, accuracy, efficiency, objectivity	N/A	N/A	English	N/A	N/A	N/A	N/A
Fostering Integrity in Research	textbook	US	the National academies of sciences, engineering and medicine	2017	https://www.nap.edu/catalog/21896/fostering-integrity-in-research	DOI: https://doi.org/10.17226/21896	research misconduct, questionable research practices, data management, mentor/trainee relationship, authorship, peer review, research with humans, research with animals, safety, conflict of interest	biomedical science, natural science and physics, engineering	bachelor students, master students, doctoral students, junior researchers, trainers	awareness, knowledge, skills	standalone	active/passive	objectivity, honesty, openess, accountability, fairness, stewardship	guidance	N/A	English	N/A	N/A	N/A	N/A
Integrity in practice toolkit	textbook	UK	UKRIO	N/A	https://ukrio.org/wp-content/uploads/UKRIO-Royal-Society-Integrity-in-Practice.pdf	N/A	N/A	no customization	bachelor students, master students, doctoral students, junior researchers, senior researchers, professors, principal investigators	attitude/behaviour, knowledge	standalone	passive	N/A	N/A	N/A	English	N/A	N/A	N/A	N/A
Integrity in scientific research	textbook	Switzerland	Swiss academies of arts and sciences	2018	www.enrio.eu/wp-content/uploads/2017/03/swiss-academies-integrity-in-scientific-research-principles-and-procedures.pdf	N/A	conflict of interest, data management, publication ethics, research misconduct, allegation of misconduct	no customization	bachelor students, master students, doctoral students, junior researchers,	awareness, knowledge	standalone	passive	honesty, openess, veracity, transparency, fairness, / deception, negligence	european guidance	N/A	English	N/A	N/A	N/A	N/A
On being a Scientist	textbook	US	the National academies of sciences, engineering and medicine	2009	https://www.nap.edu/catalog/12192/on-being-a-scientist-a-guide-to-responsible-conduct-in	N/A	mentor/trainee relationship, data management, research misconduct, allegation of misconduct, research with humans, research with animals, safety, authorship, collaborative research, intellectual property, conflict of interest, social responsibilities	biomedical science, natural science and physics, engineering	master students, doctoral students, junior researchers, trainers	attitude/behaviour, awareness, knowledge, skills	standalone	active/passive	honesty, fairness, objectivity, openess, tustworthiness, respect	N/A	https://www.nap.edu/read/12192/chapter/15	English	N/A	N/A	N/A	N/A
Open science by design	textbook	US	the National academies of sciences, engineering and medicine	2018	https://www.nap.edu/catalog/25116/open-science-by-design-realizing-a-vision-for-21st-century	DOI: https://doi.org/10.17226/25116	open science	biomedical science, natural science and physics, engineering	bachelor students, master students, doctoral students, junior researchers, senior researchers, professors, principal investigators, trainers, administative staff	awareness, knowledge, skills	standalone	passive	N/A	N/A	N/A	English	N/A	N/A	N/A	N/A
Responsible conduct of research toolkit	textbook	US	National postdocs association	2010	https://cdn.ymaws.com/www.nationalpostdoc.org/resource/resmgr/npa-rcr-toolkit.pdf	N/A	data management, mentor/trainee relationship, publication ethics, authorship, peer review, collaborative science, research misconduct,	no customization	trainers	knowledge	standalone	passive	N/A	N/A	N/A	English	N/A	N/A	N/A	N/A
Responsible conduct of research: booklet series	textbook	US	USC: University of Southern California	N/A	https://oprs.usc.edu/training/rcr/#RCRbooklets	N/A	research with animals, collaborative research, conflict of interest, data management, research with humans, mentor/trainee relationship, peer review, authorship, publication ethics, research misconduct	biomedical science	bachelor students, master students, trainers	knowledge	standalone	passive	N/A	N/A	https://oprs.usc.edu/files/2017/04/PHS_Policy_on_RCR1.pdf	English	N/A	N/A	N/A	N/A
Responsible science: vol. 1	textbook	US	the National academies of sciences, engineering and medicine	1992	https://www.nap.edu/catalog/1864/responsible-science-volume-i-ensuring-the-integrity-of-the-research	DOI: https://doi.org/10.17226/1864	research misconduct, allegation of misconduct, data management, publication ethics, mentor/trainee relationship	biomedical science, natural science and physics, engineering	bachelor students, master students, doctoral students, junior researchers, trainers	awareness, knowledge, skills	standalone	passive	respect for the integrity of knowlegde, honesty, objectivity, openess	N/A	N/A	English	N/A	N/A	N/A	N/A
Tales of research misconduct	textbook	The Netherlands	Hub Zwart	2017	https://link.springer.com/content/pdf/10.1007%2F978-3-319-65554-3.pdf	N/A	research misconduct, questionable research practices, reproducibility	no customization	bachelor students, master students, doctoral students, junior researchers,	awareness, knowledge	standalone	passive	N/A	N/A	N/A	English	N/A	N/A	N/A	N/A
The responsible conduct of research in the health science	textbook	US	the National academies of sciences, engineering and medicine	1989	https://www.nap.edu/catalog/1388/the-responsible-conduct-of-research-in-the-health-sciences	N/A	research misconduct, allegation of misconduct, publication ethics	biomedical science	bachelor students, master students, doctoral students, junior researchers,	awareness, knowledge, skills	standalone	passive	N/A	N/A	N/A	English	N/A	N/A	N/A	N/A
Using narrative and data to communicate the value of science	textbook	US	the National academies of sciences, engineering and medicine	2017	https://www.nap.edu/catalog/24695/using-narrative-and-data-to-communicate-the-value-of-science	DOI: https://doi.org/10.17226/24695	data management, research misconduct	biomedical science, natural science and physics, engineering	bachelor	awareness, knowledge, skills	standalone	passive	N/A	N/A	N/A	English	N/A	N/A	N/A	N/A
ENERI manual-research integrity and ethics	textbook	The Netherlands	Maastricht university/ Penders, Shaw, Lutz, Townend, Akrong, Zvonareva	N/A	http://eneri.eu/e-manual/	N/A	research misconduct, questionable research practices, social responsibilities, peer review, authorship, RE	biomedical science	master students, doctoral students, junior researchers,	attitude/behaviour, knowledge, awareness	standalone	passive	trustworthyness	national and international guidelines	N/A	English	N/A	N/A	N/A	N/A
For the sound development of science	textbook	Japan	Japan society for the promotion of science	2014	https://www.jsps.go.jp/j-kousei/data/rinri_e.pdf	N/A	research with humans, safety, environmental responsibilities, conflict of interest, financial responsibilities, data management, research misconduct, questionable research practices, publication ethics, copyright, collaborative research, peer review, mentor/trainee relationship, whistleblowing, social responsibilities	biomedical science	bachelor students, master students, doctoral students, junior researchers, senior researchers, professors, principal investigators, trainers, administative staff	attitude/behaviour, knowledge, awareness	standalone	passive	responsibility, freedom in research, honesty, accountability, professional courtesy and impartiality, good stewarship, confidentiality, impartiality, responsiveness, timeliness,	national and international guidelines	N/A	English, Japanese	N/A	N/A	N/A	N/A
Integrity in scientific research	textbook	US	the National academies of sciences, engineering and medicine	2002	https://www.nap.edu/catalog/10430/integrity-in-scientific-research-creating-an-environment-that-promotes-responsible	DOI: https://doi.org/10.17226/10430	data management, research misconduct	biomedical science, natural science and physics, engineering	bachelor students, master students, doctoral students, junior researchers, trainers	awareness, knowledge, skills	standalone	passive	N/A	national and international guidelines	N/A	English	N/A	N/A	N/A	N/A
Introduction to the responsible conduct of research	textbook	US	Steneck/ORI	2007	https://ori.hhs.gov/sites/default/files/rcrintro.pdf	N/A	research with humans, research with animals, conflict of interest, data management, mentor/trainee relationship, authorship, publication ethics, peer review	biomedical science	master students, doctoral students, junior researchers,	attitude/behaviour, awareness, knowledge, skills	standalone	active/passive	honesty, accuracy,efficiency, objectivity	national and international guidelines	N/A	English	N/A	N/A	N/A	N/A
Responsible science: vol. 2	textbook	US	the National academies of sciences, engineering and medicine	1993	https://www.nap.edu/catalog/2091/responsible-science-volume-ii-background-papers-and-resource-documents	DOI: https://doi.org/10.17226/2091	social responsibilities, mentor/trainee relationship, allegation of misconduct,	biomedical science, natural science and physics, engineering	bachelor students, master students, doctoral students, junior researchers, trainers	awareness, knowledge, skills	standalone	active/passive	N/A	national and international guidelines	N/A	English	N/A	N/A	N/A	N/A
Moral reasonong in scientific research	textbook, case studies	US	Bebeau (univ. of Minnesota), Pimple, Muskavitch, Borden, Smith (Indiana Univ.)	1995	https://depts.washington.edu/uwbri/PDF%20Files/Moral_Reasong_in_Scific_Res.pdf	N/A	moral reasoning, behavioural ethics	no customization	senior researchers, professors, principal investigators, trainers	attitude/behaviour, knowledge, skills	group	active/passive	N/A	N/A	N/A	English	N/A	N/A	N/A	N/A
Best practice guidelines on publishing ethics	textbook, guidance	US	Wiley	2014	https://authorservices.wiley.com/asset/Ethics_Guidelines_7.06.17.pdf	N/A	research misconduct, whistleblowing, fabrication, falsification, image manipulation, allegation of misconduct, publication ethics	no customization	bachelor students, master students, doctoral students, junior researchers,	attitude/behaviour, knowledge, skills	standalone	passive	N/A	guidelines	N/A	English	N/A	N/A	N/A	N/A
Practical Guidance on science and engineering ethics education for instructors and administrators	textbook, guidance	US	the National academies of sciences, engineering and medicine	2012	https://www.nap.edu/catalog/18519/practical-guidance-on-science-and-engineering-ethics-education-for-instructors-and-administrators	N/A	research misconduct, allegation of misconduct, authorship, publication ethics, research with humans, research with animals, collaborative research, social responsibilities, mentor/trainee relationship	no customization	trainers, administrative staff	attitude/behaviour, knowledge, skills	standalone	passive	N/A	guidance	N/A	English	N/A	N/A	N/A	N/A
Guidelines for responsible data management in scientific research	textbook/guidance	US	Clinical Tool, Inc	N/A	https://ori.hhs.gov/sites/default/files/data.pdf	N/A	N/A	biomedical science	bachelor students, master students, doctoral students, junior researchers, senior researchers, professors, principal investigators	knowledge, skills	standalone	active/passive	N/A	guideline	N/A	English	N/A	N/A	N/A	N/A
Guidelines for scientific record keeping in the intramural research program at the NIH	textbook/guidance	US	NIH	2008	https://oir.nih.gov/sites/default/files/uploads/sourcebook/documents/ethical_conduct/guidelines-scientific_recordkeeping.pdf	N/A	data management	no customization	bachelor students, master students, doctoral students, junior researchers, senior researchers, professors, principal investigators, trainers, administative staff	knowledge	standalone	passive	N/A	guideline	N/A	English	N/A	N/A	N/A	N/A
Authorship and publication agreement	video	Australia	QUT (Queensland university of tecnhology and OREI)	2018	https://figshare.com/articles/Authorship_and_publication_agreeing_on_authorship/5815887	N/A	authorship	no customization	bachelor students, master students, doctoral students, junior researchers, senior researchers, professors, principal investigators	awareness	standalone	passive	fairness	Australian code for RCR	N/A	English	03:18:00	N/A	system of rating	available
GDPR Basics for scientists	video	Luxembourg	LARI (Luxembourg Agency for RI)	2019	https://www.youtube.com/watch?v=hBzqELMe2nY	N/A	data management	no customization	bachelor students, master students, doctoral students, junior researchers, senior researchers	attitude/behaviour, awareness	standalone	passive	fairness, transparency	European GDPR	N/A	English	02:55:00	N/A	system of rating	available
Research Integrity and Ethics	video	South Africa	University of Cape Town/NIH	2014	https://www.youtube.com/watch?v=vxNqGtNHPb0	N/A	research with humans, research with animals, authoriship, publication ethics, biosecurity, collaborative research, conflict of interest, data management, mentor/trainee relationaship, research misconduct, imagine manipulation, whistleblowing	no customization	bachelor students, master students, doctoral students, junior researchers, senior researchers, professors, principal investigators	awareness, knowledge	standalone	passive	responsibilities and personal values, transparency	international codes and guidelines	N/A	English	16:28:00	N/A	system of rating	available
?	video	Norway	University of Oslo	2018	meddev.uio.no/elaring/fag/med-etikk/etikk_0909/story_html5.html	N/A	moral reasoning, behavioural ethics	biomedical science	bachelor students, master students, doctoral students	attitude/behaviour, awareness	standalone	active/passive	N/A	N/A	N/A	English	N/A	N/A	N/A	N/A
Academic Misconduct:my story	video	N/A	Mr. Thesing	2015	https://www.youtube.com/watch?v=O9XJ-jaiEc4	N/A	plagiarism	no customization	bachelor students, master students, doctoral students	awareness	standalone	passive	N/A	N/A	N/A	English	6:33 min	N/A	system of rating	available
Acceptable/unacceptable	video	US	uAlbertaDoS	2013	https://www.youtube.com/watch?v=8Bx5DAqTPhU	N/A	plagiarism	no customization	bachelor students, master students, doctoral students, junior researchers,	attitude/behaviour, awareness	standalone	passive	N/A	N/A	N/A	English	02:22:00	N/A	N/A	N/A
An introduction to Research Integrity	video	Germany	HEADT centre	2017	https://www.youtube.com/watch?v=3xsT0qG5HJc	N/A	research integrity	no customization	bachelor students, master students, doctoral students, junior researchers, senior researchers, professors, principal investigators	awareness	standalone	passive	honesty, fairness	N/A	N/A	English	04:58:00	N/A	system of rating	available
Authorship	video	N/A	Chee-Onn Leong	2017	https://www.youtube.com/watch?v=RFm7yjnXFWw	N/A	authorship	no customization	bachelor students, master students, doctoral students	awareness	standalone	passive	N/A	N/A	N/A	English	09:15:00	N/A	system of rating	available
Authorship	video	US	university of Utah	2015	https://www.youtube.com/watch?v=UMUFWuWHUt0	N/A	authorship	no customization	bachelor students, master students, doctoral students	awareness	standalone	passive	N/A	N/A	N/A	English	12 min	N/A	system of rating	available
Authorship conflict	video	N/A	authorder	2009	https://www.youtube.com/watch?v=2FtIDDo6Brk	N/A	authorship	no customization	bachelor students, master students, doctoral students	awareness	standalone	passive	N/A	N/A	N/A	English	02:42:00	N/A	system of rating	available
Beware conflict of interest	video	N/A	Dan Ariely (TED)	2011	https://www.youtube.com/watch?v=n8Y8FK8gonc	N/A	conflict of interest	no customization	bachelor students, master students, doctoral students, junior researchers, senior researchers, professors, principal investigators	awareness	standalone	passive	N/A	N/A	N/A	English	05:35:00	N/A	system of rating	available
Case study videos	video	US	ORI, WestVirginia University, CITI	N/A	https://oric.research.wvu.edu/services/responsible-conduct/core-areas	N/A	data management, conflict of interest, intelletual property, research with animals, research with humans, research misconduct, authorship, mentor/trainee relationship, peer review, collaborative research	no customization	bachelor students, master students, doctoral students, junior researchers	attitude/behaviour, awareness, knowledge	standalone	passive	N/A	N/A	N/A	English	18 videos/ 3 min. each	N/A	N/A	N/A
Cheating and plagiarism	video	The Netherlands	Erasmus University Rotterdam	N/A	https://www.eur.nl/en/about-eur/vision/cheating-and-plagiarism	N/A	plagiarism	no customization	master students, doctoral students, junior researchers	attitude/behaviour	standalone	passive	N/A	N/A	N/A	English	N/A	N/A	N/A	N/A
Concepts Unwrapped	video	US	Mc Combs school of Business, Texas	N/A	https://ethicsunwrapped.utexas.edu/series/concepts-unwrapped	N/A	moral reasoning, behavioural ethics	no customization	bachelor students, master students, doctoral students	attitude/behaviour, awareness	standalone	passive	N/A	N/A	N/A	English (transcription in Spanish)	N/A	discussion questions and related case study	system of rating	available
COPE seminar, webinar and ppt presentation	video	UK	COPE	N/A	https://publicationethics.org/resources/seminars-and-webinars	N/A	publication ethics	no customization	bachelor students, master students, doctoral students, junior researchers, senior researchers, professors, principal investigators	attitude/behaviour, awareness, knowledge	standalone	passive	transparency	N/A	N/A	English	N/A	N/A	N/A	N/A
CORE webinar	video	US	UC San Diego	N/A	http://thecore.ucsd.edu/webinars	N/A	N/A	no customization	bachelor students, master students, doctoral students, junior researchers, senior researchers	awareness, knowledge	standalone	passive	N/A	N/A	N/A	English	N/A	N/A	system of rating	available
Data fabrication and falsification	video	N/A	Chee-Onn Leong	2017	https://www.youtube.com/watch?v=j9YyxdjdLa8	N/A	falsification, fabrication, data management	biomedical science	bachelor students, master students, doctoral students	awareness	standalone	passive	N/A	N/A	N/A	English	08:53:00	N/A	system of rating	available
Elsevier academy collection	video	N/A	Elsevier academy	N/A	https://researcheracademy.elsevier.com/learn#tab-library	N/A	publication ethics, authorship, peer review, data management, open access,	no customization	bachelor students, master students, doctoral students, junior researchers, senior researchers	attitude/behaviour, awareness, knowledge, skills	standalone	active/passive	N/A	N/A	N/A	English	N/A	N/A	N/A	N/A
Et Plagieringseventyr	video	Norway	University of Bergen	2010	https://www.youtube.com/watch?time_continue=1&v=Mwbw9KF-ACY	N/A	plagiarism	no customization	bachelor students, master students, doctoral students	awareness	standalone	passive	N/A	N/A	N/A	Norwegian Sub English	05:12:00	N/A	system of rating	available
Ethics Defined (a glossary)	video	US	Mc Combs school of Business, Texas	N/A	https://ethicsunwrapped.utexas.edu/glossary	N/A	research with humans, authorship, publication ethics, research with animals, research misconduct, mentor/trainee relationship, data management, collaborative research, conflict of interest, peer review	no customization	bachelor students, master students, doctoral students	attitude/behaviour, awareness	standalone	passive	honesty, integrity, fairness, accountability, objectivity, decency	N/A	N/A	English (transcription in Spanish)	N/A	N/A	system of rating	available
Ethics of research and publishing video series	video	US	Academy of management	2014	http://aom.org/About-AOM/Ethics-of-Research---Publishing-Video-Series.aspx	N/A	authorship, questionable research practices, publication ethics, peer review	no customization	bachelor students, master students, doctoral students, junior researchers	awareness	standalone	passive	N/A	N/A	N/A	English	5/10 min./ 8 episodes	N/A	system of rating	available
First Insubria International school in methodology, ethics and integrity in biomedical science	video	Italy	Insubria University	2014	https://www.youtube.com/playlist?list=PL9wdu0_Er9E1ezVGdBUBE4rSvpSb-TVWs	N/A	reproducibility, research misconduct, conflict of interest, research with animals, work environment, publication ethics, open access	biomedical science	doctoral students,trainers	awareness, knowledge	standalone	passive	N/A	N/A	https://drive.google.com/file/d/0B6z7burLdR0QSnlRbms0Sy0xYzA/view (PPT presentation)	English, Italian	N/A	N/A	system of rating	available
how to avoid plagiarism in 5 steps	video	N/A	Steelman Library	2017	https://www.youtube.com/watch?v=UsFcU1PH_8E	N/A	plagiarism	no customization	bachelor students, master students, doctoral students	awareness	standalone	passive	N/A	N/A	N/A	English	03:39:00	N/A	system of rating	available
How trustworthy?	video	Germany	Headtcentre	N/A	https://headt.eu/BLOG/7138816	N/A	image manipulation	no customization	bachelor students, master students, doctoral students, junior researchers, senior researchers, professors, principal investigators, trainers	attitude/behaviour, knowledge, skills	standalone	passive	N/A	N/A	N/A	English	N/A	N/A	N/A	N/A
Image manipulation research	video	Germany	HEADT centre Berlin	N/A	https://www.youtube.com/watch?time_continue=68&v=2i8vuEVyMK4	N/A	image manipulation	no customization	bachelor students, master students, doctoral students	awareness	standalone	passive	N/A	N/A	N/A	English	N/A	N/A	system of rating	available
Imagine manipulation and research integrity	video	Germany	HEADT centre	2017	https://www.youtube.com/watch?v=CRSznah_xg0	N/A	imagine manipulation and research integrity	no customization	bachelor students, master students, doctoral students, junior researchers, senior researchers, professors, principal investigators	awareness	standalone	passive	N/A	N/A	N/A	English	4:40 min	N/A	system of rating	available
Integrity in scientific research video series	video	US	AAAS (American Association for the Advancement of Science)	N/A	N/A	N/A	mentor/trainee relationaship, authorship, data management, research misconduct, whistleblowing, peer review, research with animals, intellectual property, collaborative research, social responsibilities	biomedical science	master students, doctoral students, junior researchers, administrative staff	attitude/behaviour, awareness, knowledge	standalone/group	active/passive	N/A	N/A	N/A	English	N/A	N/A	N/A	N/A
Integrity in scientific research videos	video	US	ORI	N/A	https://ori.hhs.gov/integrity-scientific-research-videos	N/A	authorship, mentor/trainee relationship, grant application, research misconduct	no customization	bachelor students, master students, doctoral students, junior researchers	attitude/behaviour, awareness	standalone	passive	N/A	N/A	N/A	English	2 min each/ 5 videos	N/A	N/A	N/A
Is it difficult to identify research misconduct	video	N/A	Elsevier Journals	2014	https://www.youtube.com/watch?v=SfwPCi3ABYE	N/A	research misconduct, whistleblowing	no customization	bachelor students, master students, doctoral students, junior researchers, senior researchers, professors, principal investigators	awareness	standalone	passive	N/A	N/A	N/A	English	01:10:00	N/A	system of rating	available
Is most published research wrong?	video	N/A	Veritasium	2016	https://www.youtube.com/watch?v=42QuXLucH3Q	N/A	reproducibility	natural sciences	bachelor students, master students, doctoral students, junior researchers, senior researchers, professors, principal investigators	awareness	standalone	passive	N/A	N/A	N/A	English	12:21 min	N/A	system of rating	available
Is science reliable?	video	N/A	SciShow	2016	https://www.youtube.com/watch?v=VcgO2v3JjCU	N/A	reproducibility	biomedical science	bachelor students, master students, doctoral students, junior researchers, senior researchers, professors, principal investigators	awareness	standalone	passive	N/A	N/A	N/A	English	9:10 min	N/A	system of rating	available
Is there a reproducibility crisis in science?	video	N/A	Matt Anticole (TEDEd)	2016	https://ed.ted.com/lessons/is-there-a-reproducibility-crisis-in-science-matt-anticole#watch	N/A	reproducibility	biomedical science, natural science and physics	bachelor students, master students, doctoral students, junior researchers, senior researchers, professors, principal investigators	awareness	standalone	passive	N/A	N/A	N/A	English	04:47:00	N/A	system of rating	available
Is there a reproducibility crisis in science?	video	N/A	Nature Video	2016	https://www.youtube.com/watch?v=j7K3s_vi_1Y	N/A	reproducibility	biomedical science, natural science and physics	bachelor students, master students, doctoral students, junior researchers, senior researchers, professors, principal investigators	awareness	standalone	passive	N/A	N/A	N/A	English	2:03 min	N/A	system of rating	available
Journal peer review	video	Australia	QUT (Queensland university of tecnhology and OREI)	2018	https://figshare.com/articles/Journal_peer_review_a_history/5816595	N/A	peer review	no customization	bachelor students, master students, doctoral students, junior researchers, senior researchers	awareness, knowledge	standalone	passive	N/A	N/A	N/A	English	08:41:00	N/A	system of rating	available
Money is not the only thing that can bias research	video	N/A	Healthcare traige	2019	https://www.youtube.com/watch?v=8qUkm6U31Zo	N/A	conflict of interest, research misconduct	biomedical science	bachelor students, master students, doctoral students, junior researchers, senior researchers, professors, principal investigators	awareness	standalone	passive	N/A	N/A	N/A	English	06:50:00	N/A	system of rating	available
Only tell me the good news- bias in research publication	video	N/A	Healthcare traige	2018	https://www.youtube.com/watch?v=9fm6wHTYjAA	N/A	publication ethics	no customization	bachelor students, master students, doctoral students, junior researchers, senior researchers, professors, principal investigators	awareness	standalone	passive	N/A	N/A	N/A	English	06:49:00	N/A	system of rating	available
ORI video case studies	video	US	ORI	N/A	https://ori.hhs.gov/videos/case-study	N/A	data management, research misconduct, allegation of misconduct, reproducibility, peer review	biomedical science	bachelor students, master students, doctoral students, junior researchers	attitude/behaviour, awareness	standalone	passive	N/A	N/A	N/A	English	N/A	N/A	N/A	N/A
Peer review in 3 minutes	video	N/A	libncsu	2014	https://www.youtube.com/watch?v=rOCQZ7QnoN0	N/A	peer review	no customization	bachelor students, master students, doctoral students	awareness	standalone	passive	N/A	N/A	N/A	English	03:15:00	N/A	system of rating	available
Plagiarism	video	US	Saturday night live	2013	https://www.youtube.com/watch?v=yDxN4c_CmpI	N/A	plagiarism	no customization	bachelor students, master students, doctoral students	awareness	standalone	passive	N/A	N/A	N/A	English	6:07 min	N/A	system of rating	available
Plagiarism prevention	video	Germany	Konstanz University	N/A	https://www.plagiatspraevention.uni-konstanz.de/en/educational-material/videos/	N/A	plagiarism	no customization	bachelor students, master students, doctoral students	awareness	standalone	passive	N/A	N/A	N/A	English, German	N/A	N/A	N/A	N/A
Plagiarized	video	N/A	The Odd1sOut	2016	https://www.youtube.com/watch?v=O50AgI2gD6o	N/A	plagiarism	no customization	bachelor students, master students, doctoral students	awareness	standalone	passive	N/A	N/A	N/A	English	08:38:00	N/A	system of rating	available
Preventing plagiarism	video	Luxembourg	LARI (Luxembourg Agency for RI)	2019	https://www.youtube.com/watch?v=N3hqARstzfc	N/A	plagiarism	no customization	bachelor students, master students, doctoral students, junior researchers, senior researchers	attitude/behaviour, awareness	standalone	passive	fairness	N/A	N/A	English	02:32:00	N/A	system of rating	available
Report: former Duke cancer researcher falsified data	video	N/A	CBS 17	2015	https://www.youtube.com/watch?v=ftCPcmJJ3OQ	N/A	falsification	no customization	bachelor students, master students, doctoral students, junior researchers, senior researchers, professors, principal investigators	awareness	standalone	passive	N/A	N/A	N/A	English	4:35 min	N/A	system of rating	available
Reproducibility in research: an introduction	video	N/A	Healthcare traige	2017	https://www.youtube.com/watch?v=EvoVb_QLRK8	N/A	reproducibility	biomedical science	bachelor students, master students, doctoral students, junior researchers, senior researchers, professors, principal investigators	awareness	standalone	passive	accountability, transparency, trust	N/A	N/A	English	06:53:00	N/A	system of rating	available
Reproducibility training	video	US	NIH (national institute of health)	N/A	https://oir.nih.gov/sourcebook/ethical-conduct/responsible-conduct-research-training/instruction-responsible-conduct-research-postdoc-irta-crta-vf-research-0	N/A	reproducibility, data management	biomedical science	master students, doctoral students, junior researchers, trainers	attitude/behaviour, awareness, knowledge	standalone/group	active/passive	transparency	N/A	discussion notes fro trainers	English	N/A	N/A	N/A	N/A
Research Integrity	video	The Netherlands	University of Amsterdam	2016	https://www.youtube.com/watch?v=x_MsPvgetxw	N/A	plagiarism, conflict of interest, falsification, fabrication, open access,	biomedical science	bachelor students, master students, doctoral students	awareness, knowledge	standalone	passive	openess, transparency	N/A	N/A	English	5:48 min	N/A	system of rating	available
Research integrity and ethics issues for socio-legal research	video	Hong Kong	University of Hong Kong	N/A	http://www.law.hku.hk/researchintegrity/videos/	N/A	N/A	Law	bachelor students, master students, doctoral students	attitude/behaviour, awareness, knowledge	standalone	passive	N/A	N/A	N/A	English	N/A	N/A	system of rating	available
Research integrity NCPRE	video	US	NCPRE (National Centre for Professional & Research Ethics)	2018	http://ethicscenter.csl.illinois.edu/research-integrity/	N/A	research misconduct, work environment, reproducibility, questionable research practices, data management	no customization	bachelor students, master students, doctoral students, junior researchers, senior researchers, professors, principal investigators	awareness, knowledge	standalone	passive	N/A	N/A	N/A	English	2 videos (45 min each)	N/A	system of rating	available
Research Integrity, fostering a culture of research excellence	video	Australia	University of Sidney	2018	https://www.youtube.com/watch?v=5bvbj2j_ZGg	N/A	research integrity	no customization	bachelor students, master students, doctoral students	awareness	standalone	passive	N/A	N/A	N/A	English	3:52 min.	N/A	system of rating	available
Research misconduct	video	US	UC Office of RI	2018	https://www.youtube.com/watch?v=tCupw65dWRk	N/A	falsification, fabrication, plagiarism	biomedical science	bachelor students, master students, doctoral students	awareness	standalone	passive	N/A	N/A	N/A	English	02:22:00	N/A	system of rating	available
Research misconduct	video	N/A	Sylk SSGA	2015	https://www.youtube.com/watch?v=jbybuCgk9XU	N/A	research misconduct and research integrity	no customization	bachelor students, master students, doctoral students, junior researchers, senior researchers, professors, principal investigators	awareness	standalone	passive	trustworthyness	N/A	N/A	English	5 min	N/A	system of rating	available
Responsible conduct of biomedical research : collaborative research	video	Puerto Rico	University of Puerto Rico	2010	https://www.youtube.com/watch?v=vnBPxhCq-FY	N/A	collaborative research, authorship	biomedical science	bachelor students, master students, doctoral students, junior researchers, senior researchers, professors, principal investigators	attitude/behaviour	standalone	passive	responsibilitied, fairness, accountability,	N/A	N/A	English	53 min	N/A	system of rating	available
Seminar series by Lisa Webley	video	Hong Kong	University of Hong Kong	N/A	http://www.law.hku.hk/researchintegrity/videos/	N/A	N/A	Law	bachelor students, master students, doctoral students	attitude/behaviour, awareness, knowledge	standalone	passive	N/A	N/A	N/A	English	N/A	N/A	system of rating	available
The Ethical path to authorship	video	Luxembourg	LARI (Luxembourg Agency for RI)	2018	https://www.youtube.com/watch?v=73RM46r55b4	N/A	authorship	no customization	bachelor students, master students, doctoral students, junior researchers, senior researchers	attitude/behaviour, awareness	standalone	passive	N/A	N/A	N/A	English	2 min.	N/A	system of rating	available
Top 10 Mistakes in data management	video	N/A	Intricity 101	2014	https://www.youtube.com/watch?v=5Pl671FH6MQ	N/A	data management	no customization	bachelor students, master students, doctoral students, junior researchers, senior researchers, professors, principal investigators	awareness	standalone	passive	N/A	N/A	N/A	English	06:07:00	N/A	system of rating	available
Top 10 tips for robust & ethical research	video	Luxembourg	LARI (Luxembourg Agency for RI)	2018	https://www.youtube.com/watch?v=PCJ0GdFWje4	N/A	authorship, copyright, data management, plagiarism	no customization	bachelor students, master students, doctoral students, junior researchers, senior researchers	attitude/behaviour, awareness	standalone	passive	N/A	N/A	N/A	English	01:43:00	N/A	system of rating	available
What is figure falsification in the publishing process?	video	N/A	Elsevier Journals	2014	https://www.youtube.com/watch?v=SxkmM9aXGz8	N/A	image manipulation, falsification	no customization	bachelor students, master students, doctoral students, junior researchers, senior researchers, professors, principal investigators	awareness	standalone	passive	N/A	N/A	N/A	English	1:13 min	N/A	system of rating	available
What is Peer Review	video	US	University of Minnesota	2013	https://www.youtube.com/watch?v=O3lkm8LsgoU	N/A	peer review	no customization	bachelor students, master students, doctoral students	awareness	standalone	passive	N/A	N/A	N/A	English	02:36:00	N/A	system of rating	available
What is plagiarism and how to avoid it	video	US	Brock University library	2014	https://www.youtube.com/watch?v=Pmab92ghG0M	N/A	plagiarism	no customization	bachelor students, master students, doctoral students	awareness	standalone	passive	N/A	N/A	N/A	English	01:50:00	N/A	system of rating	available
What is plagiarism?	video	N/A	Andrew Young	2016	https://www.youtube.com/watch?v=Ly_AeHl4t5M	N/A	plagiarism	no customization	bachelor students, master students, doctoral students	awareness	standalone	passive	N/A	N/A	N/A	English	05:53:00	N/A	system of rating	available
What makes science true?	video	N/A	NOVA PBS official	2017	https://www.youtube.com/watch?v=NGFO0kdbZmk	N/A	reproducibility	biomedical science	bachelor students, master students, doctoral students, junior researchers, senior researchers, professors, principal investigators	awareness	standalone	passive	reliability	N/A	N/A	English	15 min	N/A	system of rating	available
Why cite?	video	N/A	sccclibrary	2012	https://www.youtube.com/watch?v=11XHkIR3qJw	N/A	plagiarism	no customization	bachelor students, master students, doctoral students	awareness	standalone	passive	N/A	N/A	N/A	English	01:42:00	N/A	system of rating	available
Why research integrity isn’t just ‘somebody else’s problem’	video	Europe	Elizabeth Wager (MiRoR project)	2016	https://www.youtube.com/watch?v=B3JY7O_jksk	N/A	research misconduct, questionable research practices, data management, plagiarism, authorship, conflict of interest	no customization	master students, doctoral students, junior researchers	awareness, knowledge	standalone	passive	responsibilities	N/A	N/A	English	N/A	N/A	system of rating	available
Clinical research ethics-educational material	Videos, PPT presentations, case studies	US	CTSpedia	2011	https://www.ctspedia.org/do/view/ResearchEthics/WebHome	10.1111/j.1752-8062.2010.00193.x	data management, conflict of interest, research with humans, research with animals, research misconduct, publication ethics, mentor/trainee relationship, peer review, collaborative research, authorship	biomedical science	bachelor students, master students, doctoral students, junior researchers, trainers	attitude/behaviour, knowledge, skills	standalone/group	active/passive	N/A	N/A	N/A	English	N/A	N/A	N/A	N/A
How trustworthy?	visual art	Germany	Headtcentre	N/A	https://headt.eu/How-Trustworthy	N/A	image manipulation	no customization	bachelor students, master students, doctoral students, junior researchers, senior researchers, professors, principal investigators, trainers	attitude/behaviour, knowledge, skills	standalone	passive	N/A	N/A	N/A	English	N/A	N/A	N/A	N/A
